# Supplementary material
Source: publisher figshare collection journal article supplement (https://acs.figshare.com/ndownloader/files/9686686)

# Carbene-Catalyzed formal [5+5] Reaction for Coumarin Construction and Total Synthesis of Defucogilvocarcins

Xuan Huang<sup>1 §</sup>, Tingshun Zhu<sup>1 §</sup>, Zhijian Huang<sup>1</sup>, Yuexia Zhang<sup>1</sup>, Zhichao Jin<sup>1,2</sup>,  
Giuseppe Zanoni<sup>2</sup>, and Yonggui Robin Chi<sup>1\*</sup>

<sup>1</sup>Division of Chemistry & Biological Chemistry, School of Physical & Mathematical Sciences,  
Nanyang Technological University, Singapore 637371, Singapore. <sup>2</sup>Department of Chemistry,  
University of Pavia, 27100 Pavia, Italy

§ These authors contributed equally to this work

## Supplementary Information

### Contents

|                                                                       |     |
|-----------------------------------------------------------------------|-----|
| I: General Information.....                                           | S2  |
| II: Experimental Procedures.....                                      | S3  |
| III: References.....                                                  | S18 |
| VI: <sup>1</sup> H NMR, <sup>13</sup> C NMR spectra of products ..... | S20 |

## I: General Information

All reactions were carried out under an argon atmosphere with dry solvents under anhydrous conditions, unless otherwise noted. THF were distilled from sodium-benzophenone,  $\text{CH}_2\text{Cl}_2$  and  $\text{CH}_3\text{CN}$  was distilled from calcium hydride. All the chemicals were purchased commercially and used without further purification, unless otherwise stated. Flash chromatography was performed using silica gel (200-300 mesh). Reactions were monitored by thin layer chromatography (TLC). Visualization was achieved under a UV lamp (254nm and 365 nm),  $\text{I}_2$  and by developing the plates with *p*-anisaldehyde or phosphomolybdic acid.  $^1\text{H}$  and  $^{13}\text{C}$  NMR were recorded on Bruker BBFO 400 MHz NMR, Bruker AV-500 MHz NMR spectrometer with TMS as the internal standard and were calibrated using residual undeuterated solvent as an internal reference ( $\text{CDCl}_3$ :  $^1\text{H}$  NMR = 7.26,  $^{13}\text{C}$  NMR = 77.16). The following abbreviations were used to explain the multiplicities: s = singlet, d = doublet, t = triplet, q = quartet, m = multiplet, *br* = broad. Coupling constants (*J*) are reported in Hertz (Hz). IR spectra were recorded on a Shimadzu IR Prestige-21 FT-IR spectrometer as neat thinfilms between KBr plates. High resolution Mass spectra (HRMS) were recorded by using Finnigan MAT 95 XP mass spectrometer (Thermo Electron Corporation). Enals **3**<sup>1</sup> and furanone **4**<sup>2</sup> were prepared with reported procedures or commercial available. If not further mentioned, silica gel column chromatography for product purification was eluted with hexane/ethyl acetate.

## II: Experimental Procedures

Table 1. Optimization of the reaction conditions<sup>a</sup>

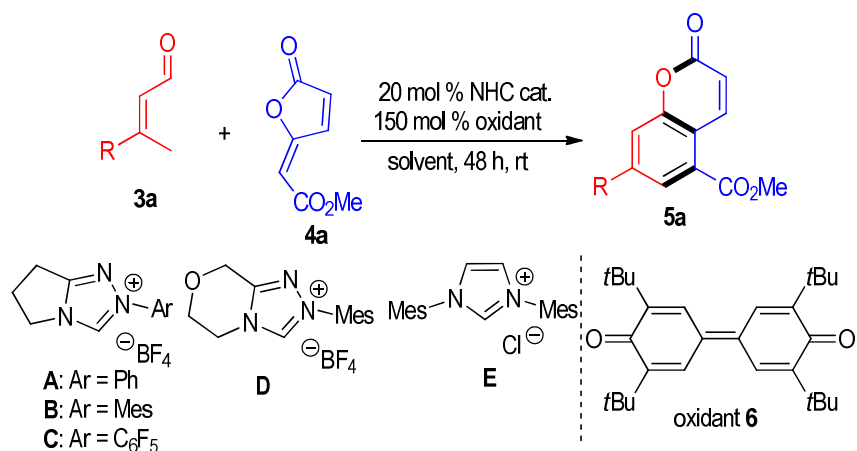

| Entry | NHC      | Base                                        | Solvent     | Temp.(°C) | Time(h)   | Yield(%) <sup>b</sup> |
|-------|----------|---------------------------------------------|-------------|-----------|-----------|-----------------------|
| 1     | <b>A</b> | Cs <sub>2</sub> CO <sub>3</sub> (1.0 eq)    | THF         | 23        | 48        | trace                 |
| 2     | <b>B</b> | Cs <sub>2</sub> CO <sub>3</sub> (1.0 eq)    | THF         | 23        | 48        | 14                    |
| 3     | <b>C</b> | Cs <sub>2</sub> CO <sub>3</sub> (1.0 eq)    | THF         | 23        | 48        | trace                 |
| 4     | <b>D</b> | Cs <sub>2</sub> CO <sub>3</sub> (1.0 eq)    | THF         | 23        | 48        | 5                     |
| 5     | <b>E</b> | Cs <sub>2</sub> CO <sub>3</sub> (1.0 eq)    | THF         | 23        | 48        | trace                 |
| 6     | <b>B</b> | DBU (1.0 eq)                                | THF         | 23        | 48        | trace                 |
| 7     | <b>B</b> | Et <sub>3</sub> N (1.0 eq)                  | THF         | 23        | 48        | 0                     |
| 8     | <b>B</b> | K <sub>3</sub> PO <sub>4</sub> (1.0 eq)     | THF         | 23        | 48        | 50                    |
| 9     | <b>B</b> | K <sub>3</sub> PO <sub>4</sub> (1.0 eq)     | DCM         | 23        | 48        | 53                    |
| 10    | <b>B</b> | K <sub>3</sub> PO <sub>4</sub> (1.0 eq)     | MeCN        | 23        | 48        | 76                    |
| 11    | <b>B</b> | K <sub>3</sub> PO <sub>4</sub> (1.0 eq)     | MeCN        | 40        | 24        | 66                    |
| 12    | <b>B</b> | K <sub>3</sub> PO <sub>4</sub> (1.0 eq)     | MeCN        | 60        | 3         | 55                    |
| 13    | <b>B</b> | K <sub>3</sub> PO <sub>4</sub> (1.0 eq)     | MeCN        | 80        | 3         | 60                    |
| 14    | <b>B</b> | K <sub>3</sub> PO <sub>4</sub> (1.2 eq)     | MeCN        | 23        | 48        | 79                    |
| 15    | <b>B</b> | <b>K<sub>3</sub>PO<sub>4</sub> (1.5 eq)</b> | <b>MeCN</b> | <b>23</b> | <b>48</b> | <b>86</b>             |
| 16    | <b>B</b> | K <sub>3</sub> PO <sub>4</sub> (2.0 eq)     | MeCN        | 23        | 48        | 77                    |
| 17    | --       | K <sub>3</sub> PO <sub>4</sub> (1.5eq)      | MeCN        | 23        | 48        | 0                     |

<sup>a</sup>Reaction conditions unless otherwise specified: **3a** (0.12 mmol), **4a** (0.10 mmol), NHC (0.02mmol), **4** (0.15 mmol), base (0.10 mmol), solvent (1 mL), 4 Å molecular sieves, 48 h, rt. <sup>b</sup>Isolated yield based on **1a** after chromatography.

As shown in Supplementary Table 1, Triazolium-based NHC catalyst **B** and **D** with an *N*-mesityl substituent were found to mediate the formation of **5a**.( Supplementary Table 1, entries 2 & 4). Selection of base is critical for this reaction. Changing Cs<sub>2</sub>CO<sub>3</sub> to DBU or Et<sub>3</sub>N led to little formation of **5a** (Supplementary Table 1, entries 6-7), and K<sub>3</sub>PO<sub>4</sub> was found to be the best base for the reaction(Supplementary Table 1, entry 8). Solvent screening show CH<sub>3</sub>CN is better than CH<sub>2</sub>Cl<sub>2</sub> or THF (Supplementary Table 1, entries 9-10). Increasing reaction temperature can shorten the reaction time, but with slightly lower yield (Supplementary Table 1, entries 11-13). Screening the amount of base K<sub>3</sub>PO<sub>4</sub> showed 1.5equiv is the optimized (Supplementary Table1, entries 14-16). No reaction occurred without NHC precatalyst.

#### General procedure for the catalytic synthesis of products **5**

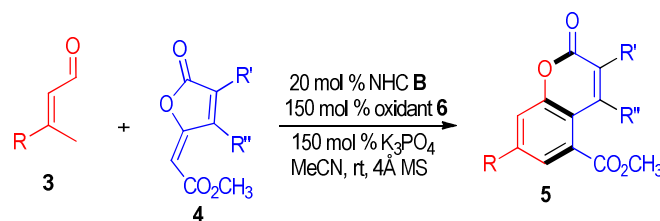

Under Ar atmosphere, a solution of enal **3** (0.12 mmol), furanone **4** (0.1 mmol), oxidant **6** (0.15 mmol), K<sub>3</sub>PO<sub>4</sub> (0.1 mmol or 0.15 mmol), activated 4Å MS (30 mg) and NHC pre-catalyst **B** (0.02 mmol) in 1.0 mL MeCN was stirred at rt for 48 hours. The mixture was concentrated under reduced pressure and purified by silica gel column chromatography to afford the corresponding product **5**.

#### Methyl 2-oxo-7-phenyl-2H-chromene-5-carboxylate (**5a**)

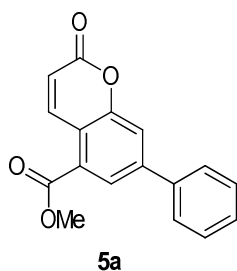

White solid (48 mg, 86%); mp 184–185 °C;

<sup>1</sup>H NMR (400 MHz, CDCl<sub>3</sub>) δ 8.87 (d, *J* = 10.0 Hz, 1H), 8.17 (s, 1H), 7.69 (s, 1H), 7.63 (d, *J* = 7.6 Hz, 2H), 7.54 – 7.38 (m, 3H), 6.50 (d, *J* = 10.0 Hz, 1H), 3.99 (s, 3H); <sup>13</sup>C NMR (100 MHz, CDCl<sub>3</sub>) δ 166.2, 159.9, 155.3, 144.1, 141.2, 138.2, 129.3, 129.1, 128.0, 127.3, 126.2,

119.1, 117.7, 117.5, 52.8; IR  $\nu_{\max}$  (neat,  $\text{cm}^{-1}$ ): 1755, 1717, 1607, 1252, 1209, 1026, 849, 696;  
HRMS: (ESI) for  $\text{C}_{17}\text{H}_{13}\text{O}_4^+ [\text{M}+\text{H}]^+$ : calcd 281.0808, found 281.0819.

**Methyl 2-oxo-7-(p-tolyl)-2H-chromene-5-carboxylate (5b)**

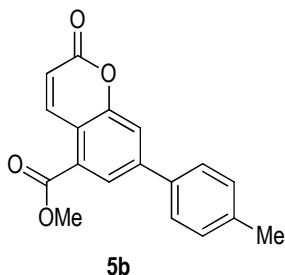

White solid (52 mg, 88%); mp 202–203 °C;

$^1\text{H}$  NMR (400 MHz,  $\text{CDCl}_3$ )  $\delta$  8.87 (d,  $J$  = 10.0 Hz, 1H), 8.17 (d,  $J$  = 1.6 Hz, 1H), 7.69 (s, 1H), 7.55 (d,  $J$  = 8.0 Hz, 2H), 7.30 (d,  $J$  = 8.0 Hz, 2H), 6.50 (d,  $J$  = 10.0 Hz, 1H), 4.00 (s, 3H), 2.42 (s, 3H);  $^{13}\text{C}$  NMR (100 MHz,  $\text{CDCl}_3$ )  $\delta$  166.3, 160.0, 155.4, 144.1, 141.2, 139.3, 135.3, 130.1, 128.0, 127.1, 126.0, 118.8, 117.5, 117.3,

52.8, 21.3; IR  $\nu_{\max}$  (neat,  $\text{cm}^{-1}$ ): 1744, 1721, 1609, 1433, 1338, 1321, 1254, 1215, 1109, 1028, 822; HRMS: (ESI) for  $\text{C}_{18}\text{H}_{15}\text{O}_4^+ [\text{M}+\text{H}]^+$ : calcd 295.0965, found 295.0976.

**Methyl 7-(4-fluorophenyl)-2-oxo-2H-chromene-5-carboxylate (5c)**

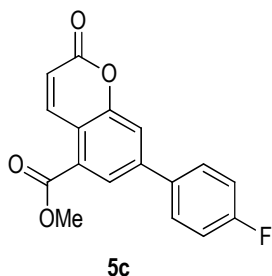

Yellow solid (38 mg, 67%); mp 172–173 °C;

$^1\text{H}$  NMR (400 MHz,  $\text{CDCl}_3$ )  $\delta$  8.86 (d,  $J$  = 10.0 Hz, 1H), 8.12 (d,  $J$  = 2.0 Hz, 1H), 7.68 – 7.54 (m, 3H), 7.24 – 7.13 (m, 2H), 6.50 (d,  $J$  = 10.0 Hz, 1H), 3.99 (s, 3H);  $^{13}\text{C}$  NMR (100 MHz,  $\text{CDCl}_3$ )  $\delta$  166.1, 163.5 (d,  $J_{\text{CF}}$  = 249.6 Hz), 159.8, 155.4, 143.0, 141.1, 134.4 (d,  $J_{\text{CF}}$  = 3.3 Hz), 129.1 (d,  $J_{\text{CF}}$  = 8.4 Hz), 128.2, 126.0, 118.9, 117.8,

117.5, 116.4 (d,  $J_{\text{CF}}$  = 21.8 Hz), 52.9;  $^{19}\text{F}$  NMR (377 MHz,  $\text{CDCl}_3$ )  $\delta$  -112.5; IR  $\nu_{\max}$  (neat,  $\text{cm}^{-1}$ ): 1748, 1713, 1609, 1516, 1425, 1256, 1231, 1117, 1026, 829; HRMS: (ESI) for  $\text{C}_{17}\text{H}_{12}\text{O}_4\text{F}^+ [\text{M}+\text{H}]^+$ : calcd 299.0714, found 299.0726.

**Methyl 7-(4-chlorophenyl)-2-oxo-2H-chromene-5-carboxylate (5d)**

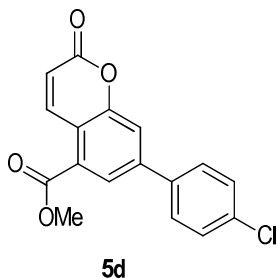

White solid (45 mg, 72%); mp 174–175 °C;

$^1\text{H}$  NMR (400 MHz,  $\text{CDCl}_3$ )  $\delta$  8.87 (d,  $J$  = 10.0 Hz, 1H), 8.13 (d,  $J$  = 1.6 Hz, 1H), 7.66 (s, 1H), 7.57 (d,  $J$  = 8.4 Hz, 2H), 7.47 (d,  $J$  = 8.4 Hz, 2H), 6.52 (d,  $J$  = 10.0 Hz, 1H), 4.00 (s, 3H);  $^{13}\text{C}$  NMR (100

MHz, CDCl<sub>3</sub>)  $\delta$  166.1, 159.8, 155.4, 142.8, 141.1, 136.7, 135.4, 129.6, 128.5, 128.3, 126.0, 119.0, 118.0, 117.8, 52.9; IR  $\nu_{\max}$  (neat, cm<sup>-1</sup>): 1751, 1713, 1610, 1502, 1433, 1253, 1234, 1215, 1092, 1036, 957, 902, 787; HRMS: (ESI) for C<sub>17</sub>H<sub>12</sub>O<sub>4</sub>Cl<sup>+</sup> [M+H]<sup>+</sup>: calcd 315.0419, found 315.0420.

**Methyl 7-(4-bromophenyl)-2-oxo-2H-chromene-5-carboxylate (5e)**

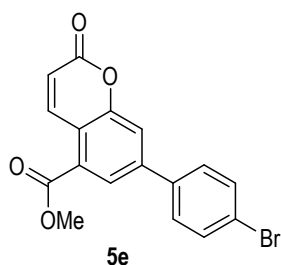

Yellow solid (54.5 mg, 76%); mp 174–175 °C;

<sup>1</sup>H NMR (400 MHz, CDCl<sub>3</sub>)  $\delta$  8.88 (d, *J* = 10.0 Hz, 1H), 8.14 (d, *J* = 2.0 Hz, 1H), 7.67 (d, *J* = 1.6 Hz, 1H), 7.66 – 7.60 (m, 2H), 7.56 – 7.48 (m, 2H), 6.53 (d, *J* = 10.0 Hz, 1H), 4.00 (s, 3H); <sup>13</sup>C NMR (100 MHz, CDCl<sub>3</sub>)  $\delta$  166.1, 159.8, 155.4, 142.9, 141.1, 137.2,

132.6, 128.8, 128.3, 125.9, 123.7, 119.0, 118.0, 117.9, 52.9; IR  $\nu_{\max}$  (neat, cm<sup>-1</sup>): 1747, 1713, 1608, 1434, 1340, 1254, 1119, 1032, 837, 816; HRMS: (ESI) for C<sub>17</sub>H<sub>12</sub>O<sub>4</sub>Br<sup>+</sup> [M+H]<sup>+</sup>: calcd 358.9913, found 358.9911.

**Methyl 7-(4-methoxyphenyl)-2-oxo-2H-chromene-5-carboxylate (5f)**

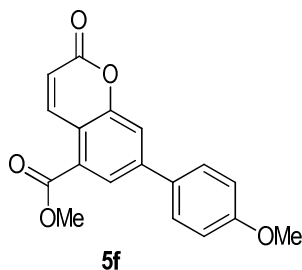

White solid (37 mg 60%); mp 170–172 °C;

<sup>1</sup>H NMR (400 MHz, CDCl<sub>3</sub>)  $\delta$  8.85 (d, *J* = 10.0 Hz, 1H), 8.14 (d, *J* = 2.0 Hz, 1H), 7.65 (d, *J* = 1.2 Hz, 1H), 7.59 (d, *J* = 8.8 Hz, 2H), 7.01 (d, *J* = 8.8 Hz, 2H), 6.48 (d, *J* = 10.0 Hz, 1H), 3.99 (s, 3H), 3.87 (s, 3H); <sup>13</sup>C NMR (100 MHz, CDCl<sub>3</sub>)  $\delta$  166.3, 160.6, 160.1, 155.5, 143.8, 141.3, 130.6, 128.5, 128.0, 125.7, 118.4,

117.3, 117.0, 114.8, 55.6, 52.8; IR  $\nu_{\max}$  (neat, cm<sup>-1</sup>): 1740, 1721, 1605, 1518, 1259, 1111, 1032, 829; HRMS: (ESI) for C<sub>18</sub>H<sub>14</sub>O<sub>5</sub>Na<sup>+</sup> [M+Na]<sup>+</sup>: calcd 333.0733, found 333.0733.

**Methyl 7-(3-methoxyphenyl)-2-oxo-2H-chromene-5-carboxylate (5g)**

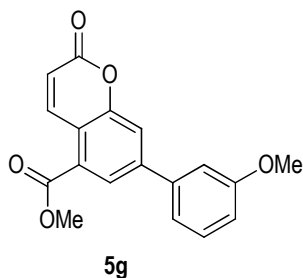

Yellow solid (53 mg, 85%); mp 196–198 °C;

$^1\text{H}$  NMR (400 MHz,  $\text{CDCl}_3$ )  $\delta$  8.89 (d,  $J = 10.0$  Hz, 1H), 8.18 (d,  $J = 1.6$  Hz, 1H), 7.71 (d,  $J = 1.6$  Hz, 1H), 7.42 (t,  $J = 8.0$  Hz, 1H), 7.23 (d,  $J = 7.6$  Hz, 1H), 7.16 (t,  $J = 1.6$  Hz, 1H), 6.99 (dd,  $J = 8.4, 2.0$  Hz, 1H), 6.53 (d,  $J = 10.0$  Hz, 1H), 4.00 (s, 3H), 3.89 (s, 3H);  $^{13}\text{C}$  NMR (100 MHz,  $\text{CDCl}_3$ )  $\delta$  166.3, 160.4, 160.0, 155.4,

144.1, 141.2, 139.8, 130.5, 128.1, 126.3, 119.8, 119.3, 117.8, 117.7, 114.4, 113.2, 55.6, 52.9; IR  $\nu_{\text{max}}$  (neat,  $\text{cm}^{-1}$ ): 1742, 1719, 1607, 1580, 1439, 1319, 1257, 1207, 1111, 1028, 878, 845, 777; HRMS: (ESI) for  $\text{C}_{18}\text{H}_{14}\text{O}_5\text{Na}$   $[\text{M}+\text{Na}]^+$ : calcd 333.0733, found 333.0740.

**Methyl 7-(2-methoxyphenyl)-2-oxo-2H-chromene-5-carboxylate (5h)**

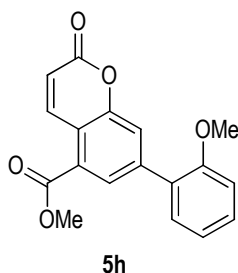

White solid (28 mg, 45%); mp 163–167 °C;

$^1\text{H}$  NMR (400 MHz,  $\text{CDCl}_3$ )  $\delta$  8.90 (d,  $J = 10.0$  Hz, 1H), 8.11 (d,  $J = 1.6$  Hz, 1H), 7.75 (d,  $J = 1.2$  Hz, 1H), 7.46 – 7.32 (m, 2H), 7.08 (td,  $J = 7.6, 0.8$  Hz, 1H), 7.03 (d,  $J = 8.0$  Hz, 1H), 6.51 (d,  $J = 10.0$  Hz, 1H), 3.97 (s, 3H), 3.85 (s, 3H);  $^{13}\text{C}$  NMR (100 MHz,  $\text{CDCl}_3$ )  $\delta$  166.4, 160.2, 156.6, 154.7, 141.9, 141.4, 130.7, 130.4, 128.9, 127.8, 127.2,

122.2, 121.3, 117.7, 117.3, 111.6, 55.7, 52.7; IR  $\nu_{\text{max}}$  (neat,  $\text{cm}^{-1}$ ): 1740, 1713, 1611, 1258, 1215, 1111, 1028, 833, 752; HRMS: (ESI) for  $\text{C}_{18}\text{H}_{15}\text{O}_5$   $[\text{M}+\text{H}]^+$ : calcd 311.0914, found 311.0912.

**Methyl 7-(furan-2-yl)-2-oxo-2H-chromene-5-carboxylate (5i)**

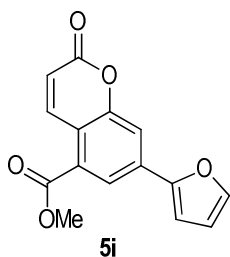

White solid (27 mg, 50%); mp 168–169 °C;

$^1\text{H}$  NMR (400 MHz,  $\text{CDCl}_3$ )  $\delta$  8.82 (d,  $J = 10.0$  Hz, 1H), 8.18 (d,  $J = 2.0$  Hz, 1H), 7.71 (s, 1H), 7.56 (d,  $J = 1.2$  Hz, 1H), 6.87 (d,  $J = 3.6$  Hz, 1H), 6.55 (dd,  $J = 3.2, 1.6$  Hz, 1H), 6.47 (d,  $J = 10.0$  Hz, 1H), 3.99 (s, 3H);  $^{13}\text{C}$  NMR (100 MHz,  $\text{CDCl}_3$ )  $\delta$  166.0, 159.9, 155.5, 151.4, 144.1, 141.1, 133.3, 128.3, 122.8, 117.4, 117.3, 115.2, 112.5, 108.8, 52.9; IR

$\nu_{\max}$  (neat,  $\text{cm}^{-1}$ ): 1745, 1717, 1610, 1585, 1254, 1207, 1113, 1028, 845; HRMS: (ESI) for  $\text{C}_{15}\text{H}_{11}\text{O}_5$   $[\text{M}+\text{H}]^+$ : calcd 271.0601, found 271.0605.

**Methyl 2-oxo-7-(thiophen-2-yl)-2H-chromene-5-carboxylate (5j)**

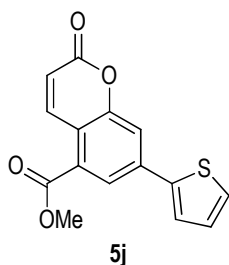

White solid (40.5 mg, 71%); mp 182–183 °C;

$^1\text{H}$  NMR (400 MHz,  $\text{CDCl}_3$ )  $\delta$  8.82 (d,  $J$  = 10.0 Hz, 1H), 8.14 (d,  $J$  = 2.0 Hz, 1H), 7.67 (d,  $J$  = 1.6 Hz, 1H), 7.47 (dd,  $J$  = 3.6, 1.2 Hz, 1H), 7.42 (dd,  $J$  = 5.2, 1.0 Hz, 1H), 7.14 (dd,  $J$  = 5.2, 3.6 Hz, 1H), 6.47 (d,  $J$  = 10.0 Hz, 1H), 4.00 (s, 3H);  $^{13}\text{C}$  NMR (100 MHz,  $\text{CDCl}_3$ )  $\delta$  166.0,

159.8, 155.4, 141.3, 141.1, 137.3, 128.8, 128.3, 127.5, 125.6, 124.8, 117.5, 117.2, 52.9; IR  $\nu_{\max}$  (neat,  $\text{cm}^{-1}$ ): 1728, 1607, 1308, 1256, 1215, 1115, 1036, 733; HRMS: (ESI) for  $\text{C}_{15}\text{H}_{10}\text{O}_4\text{SNa}$   $[\text{M}+\text{Na}]^+$ : calcd 309.0192, found 309.0198.

**Methyl 7-(naphthalen-2-yl)-2-oxo-2H-chromene-5-carboxylate (5k)**

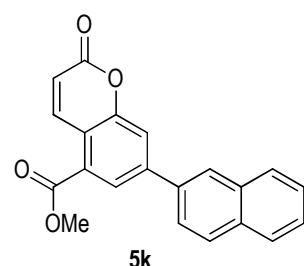

White solid (63 mg, 95%); mp 211–212 °C;

$^1\text{H}$  NMR (400 MHz,  $\text{CDCl}_3$ )  $\delta$  8.91 (d,  $J$  = 10.0 Hz, 1H), 8.33 (d,  $J$  = 1.6 Hz, 1H), 8.13 (d,  $J$  = 1.2 Hz, 1H), 8.01 – 7.87 (m, 3H), 7.85 (d,  $J$  = 1.2 Hz, 1H), 7.77 (dd,  $J$  = 8.4, 2.0 Hz, 1H), 7.61 – 7.49 (m, 2H), 6.54 (d,  $J$  = 10.0 Hz, 1H), 4.03 (s, 3H);  $^{13}\text{C}$  NMR

(100 MHz,  $\text{CDCl}_3$ )  $\delta$  166.3, 160.0, 155.5, 144.1, 141.2, 135.5, 133.6, 133.4, 129.3, 128.6, 128.2, 127.9, 127.1, 127.0, 126.7, 126.4, 124.7, 119.3, 117.8, 117.6, 52.9; IR  $\nu_{\max}$  (neat,  $\text{cm}^{-1}$ ): 1748, 1721, 1609, 1439, 1260, 1219, 1107, 1030, 843, 824, 756; HRMS: (ESI) for  $\text{C}_{21}\text{H}_{15}\text{O}_4$   $[\text{M}+\text{H}]^+$ : calcd 331.0965, found 331.0972.

**Methyl 7-(naphthalen-1-yl)-2-oxo-2H-chromene-5-carboxylate (5l)**

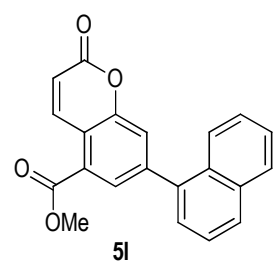

Yellow solid (42 mg, 64%); mp 149–151 °C;

$^1\text{H}$  NMR (500 MHz,  $\text{CDCl}_3$ )  $\delta$  8.97 (d,  $J$  = 10.0 Hz, 1H), 8.11 (d,  $J$  = 2.0 Hz, 1H), 7.94 (dd,  $J$  = 8.0, 3.0 Hz, 2H), 7.81 (d,  $J$  = 8.5 Hz, 1H), 7.67 (d,  $J$  = 1.5 Hz, 1H), 7.60 – 7.52 (m, 2H), 7.52 – 7.42 (m, 2H), 6.58 (d,  $J$  = 10.0 Hz, 1H), 3.96 (s, 3H);  $^{13}\text{C}$  NMR (125 MHz,

$\text{CDCl}_3$ )  $\delta$  166.2, 159.9, 154.9, 144.2, 141.3, 137.3, 134.0, 131.1, 129.3, 129.2, 128.8, 127.7,



127.4, 127.0, 126.4, 125.5, 125.2, 122.5, 118.1, 117.7, 52.8; IR  $\nu_{\max}$  (neat,  $\text{cm}^{-1}$ ): 1738, 1724, 1608, 1431, 1381, 1338, 1263, 1234, 1206, 1119, 1036, 945, 839, 806, 785; HRMS: (ESI) for  $\text{C}_{21}\text{H}_{15}\text{O}_4^+ [\text{M}+\text{H}]^+$ : calcd 331.0965, found 331.0976.

**Methyl 3-methyl-2-oxo-7-phenyl-2H-chromene-5-carboxylate (5m)**

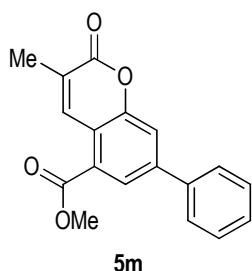

Yellow solid (44.5 mg, 76%); mp 181–182 °C;

$^1\text{H}$  NMR (400 MHz,  $\text{CDCl}_3$ )  $\delta$  8.68 (d,  $J$  = 0.8 Hz, 1H), 8.14 (d,  $J$  = 1.6 Hz, 1H), 7.67 (d,  $J$  = 1.2 Hz, 1H), 7.65 – 7.58 (m, 2H), 7.55 – 7.45 (m, 2H), 7.45 – 7.38 (m, 1H), 3.99 (s, 3H), 2.26 (d,  $J$  = 1.2 Hz, 3H);  $^{13}\text{C}$  NMR (100 MHz,  $\text{CDCl}_3$ )  $\delta$  166.4, 161.4, 154.5, 142.7, 138.4, 136.9, 129.3, 128.9, 127.3, 127.2, 126.0, 118.7, 118.4, 52.7,

17.8; IR  $\nu_{\max}$  (neat,  $\text{cm}^{-1}$ ): 1728, 1709, 1605, 1580, 1439, 1246, 1165, 1028, 756; HRMS: (ESI) for  $\text{C}_{18}\text{H}_{15}\text{O}_4^+ [\text{M}+\text{H}]^+$ : calcd 295.0965, found 295.0970.

**Methyl 3-methyl-2-oxo-7-(p-tolyl)-2H-chromene-5-carboxylate (5n)**

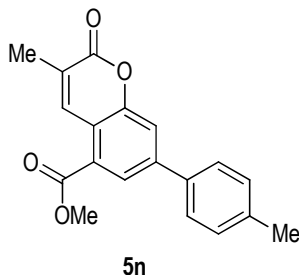

White solid (48 mg, 78%); mp 186–190 °C;

$^1\text{H}$  NMR (500 MHz,  $\text{CDCl}_3$ )  $\delta$  8.68 (s, 1H), 8.13 (d,  $J$  = 1.5 Hz, 1H), 7.66 (d,  $J$  = 1.5 Hz, 1H), 7.53 (d,  $J$  = 8.5 Hz, 2H), 7.29 (d,  $J$  = 7.9 Hz, 2H), 3.99 (s, 3H), 2.41 (s, 3H), 2.26 (d,  $J$  = 1.0 Hz, 3H);  $^{13}\text{C}$  NMR (125 MHz,  $\text{CDCl}_3$ )  $\delta$  166.5, 161.5, 154.5, 142.7, 139.0, 137.0, 135.5, 130.0, 127.2, 127.1, 127.0, 125.8, 118.4,

118.1, 52.7, 21.3, 17.8; IR  $\nu_{\max}$  (neat,  $\text{cm}^{-1}$ ): 1728, 1607, 1435, 1244, 1180, 822; HRMS: (ESI) for  $\text{C}_{19}\text{H}_{17}\text{O}_4^+ [\text{M}+\text{H}]^+$ : calcd 309.1121, found 309.1130.

**Methyl 7-(4-chlorophenyl)-3-methyl-2-oxo-2H-chromene-5-carboxylate (5o)**

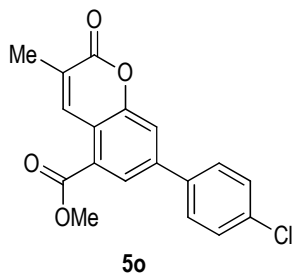

White solid (62 mg, 94%); mp 167–169 °C;

$^1\text{H}$  NMR (400 MHz,  $\text{CDCl}_3$ )  $\delta$  8.69 (d,  $J$  = 0.8 Hz, 1H), 8.11 (d,  $J$  = 1.6 Hz, 1H), 7.65 (d,  $J$  = 1.6 Hz, 1H), 7.60 – 7.53 (m, 2H), 7.51 – 7.43 (m, 2H), 4.00 (s, 3H), 2.27 (d,  $J$  = 1.2 Hz, 3H);  $^{13}\text{C}$  NMR

(100 MHz, CDCl<sub>3</sub>)  $\delta$  166.3, 161.3, 154.5, 141.5, 136.9, 136.8, 135.2, 129.6, 128.5, 127.7, 127.5, 125.8, 118.7, 118.6, 52.8, 17.8; IR  $\nu_{\max}$  (neat, cm<sup>-1</sup>): 1736, 1724, 1609, 1501, 1429, 1346, 1244, 1088, 1003, 824, 758; HRMS: (ESI) for C<sub>18</sub>H<sub>14</sub>O<sub>4</sub>Cl<sup>+</sup> [M+H]<sup>+</sup>: calcd 329.0575, found 329.0583.

**Methyl 7-(3-methoxyphenyl)-3-methyl-2-oxo-2H-chromene-5-carboxylate (5p)**

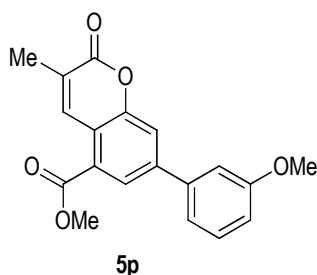

White solid (57 mg, 88%); mp 175–177 °C;

<sup>1</sup>H NMR (400 MHz, CDCl<sub>3</sub>)  $\delta$  8.67 (s, 1H), 8.11 (d, *J* = 1.6 Hz, 1H), 7.64 (s, 1H), 7.38 (t, *J* = 8.0 Hz, 1H), 7.19 (d, *J* = 7.6 Hz, 1H), 7.12 (s, 1H), 6.95 (dd, *J* = 8.0, 2.4 Hz, 1H), 3.98 (s, 3H), 3.87 (s, 3H), 2.25 (s, 3H); <sup>13</sup>C NMR (100 MHz, CDCl<sub>3</sub>)  $\delta$

166.4, 161.3, 160.3, 154.4, 142.5, 139.8, 136.8, 130.3, 127.3,

127.1, 126.0, 119.6, 118.7, 118.5, 114.1, 113.0, 55.5, 52.7, 17.7; IR  $\nu_{\max}$  (neat, cm<sup>-1</sup>): 1721, 1609, 1582, 1441, 1400, 1348, 1256, 1215, 1026, 878, 777; HRMS: (ESI) for C<sub>19</sub>H<sub>17</sub>O<sub>5</sub><sup>+</sup> [M+H]<sup>+</sup>: calcd 325.1071, found 325.1072.

**Methyl 7-(furan-2-yl)-3-methyl-2-oxo-2H-chromene-5-carboxylate (5q)**

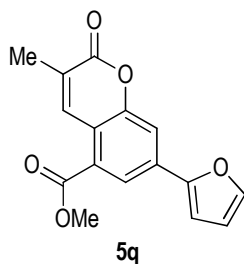

White solid (40 mg, 71%); mp 166–167 °C;

<sup>1</sup>H NMR (400 MHz, CDCl<sub>3</sub>)  $\delta$  8.63 (s, 1H), 8.16 (d, *J* = 1.6 Hz, 1H), 7.69 (s, 1H), 7.54 (d, *J* = 1.6 Hz, 1H), 6.83 (d, *J* = 3.6 Hz, 1H), 6.53 (dd, *J* = 3.6, 1.6 Hz, 1H), 3.99 (s, 3H), 2.25 (d, *J* = 1.2 Hz, 3H); <sup>13</sup>C

NMR (100 MHz, CDCl<sub>3</sub>)  $\delta$  166.3, 161.4, 154.6, 151.6, 143.8, 136.9,

132.1, 127.4, 127.0, 122.7, 118.2, 114.9, 112.4, 108.2, 52.7, 17.8; IR  $\nu_{\max}$  (neat, cm<sup>-1</sup>): 1728, 1610, 1250, 1028, 1011, 735; HRMS: (ESI) for C<sub>16</sub>H<sub>13</sub>O<sub>5</sub><sup>+</sup> [M+H]<sup>+</sup>: calcd 285.0757, found 285.0772.

### Methyl 3,4-dimethyl-2-oxo-7-phenyl-2H-chromene-5-carboxylate (**5r**)

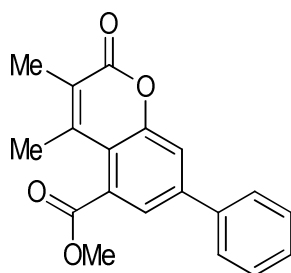

**5r**

Yellow solid (37 mg, 60%); mp 169–170 °C

$^1\text{H}$  NMR (500 MHz,  $\text{CDCl}_3$ )  $\delta$  7.65 – 7.63 (m, 1H), 7.63 – 7.60 (m, 2H), 7.59 (d,  $J$  = 1.6 Hz, 1H), 7.51 – 7.45 (m, 2H), 7.45 – 7.39 (m, 1H), 3.98 (s, 3H), 2.32 (d,  $J$  = 0.4 Hz, 3H), 2.25 (d,  $J$  = 0.4 Hz, 3H);  $^{13}\text{C}$  NMR (125 MHz,  $\text{CDCl}_3$ )  $\delta$  170.1, 161.2, 152.9, 145.3, 142.7, 138.2, 131.7, 129.3, 128.9, 127.2, 124.7, 123.7,

117.5, 117.1, 53.2, 17.9, 14.0; IR  $\nu_{\text{max}}$  (neat,  $\text{cm}^{-1}$ ): 1724, 1601, 1437, 1348, 1331, 1219, 1101, 1018, 766; HRMS: (ESI) for  $\text{C}_{19}\text{H}_{17}\text{O}_4^+$   $[\text{M}+\text{H}]^+$ : calcd 309.1121, found 309.1119.

### Methyl (*E*)-2-oxo-7-styryl-2H-chromene-5-carboxylate (**5s**)

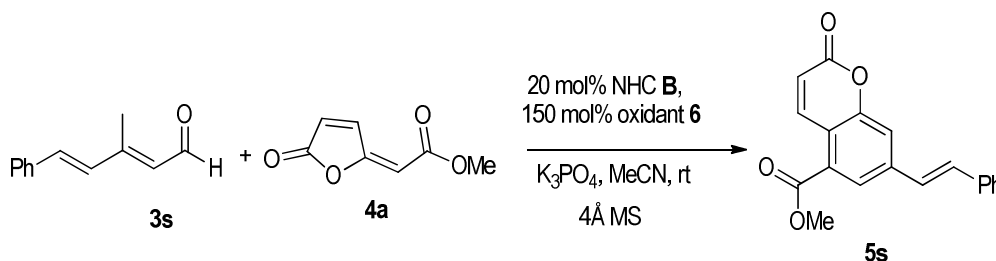

Under Ar atmosphere, a solution of enal **3s** (1.70 g, 9.9mmol) and **4a** (1.38 g, 9.0 mmol), oxidant **6** (4.1 g, 9.9mmol),  $\text{K}_3\text{PO}_4$  (2.9 g, 13.5 mmol), activated 4 Å MS (1 g) and NHC pre-catalyst **B** (550 mg, 1.8mmol) in 80 mL MeCN was stirred at rt for 48 hours. The mixture was concentrated under reduced pressure and purified by silica gel column chromatography to afford the corresponding product **5s** (1.93 g, 70%) as a red solid; mp 165–167 °C;  $^1\text{H}$  NMR (400 MHz,  $\text{CDCl}_3$ )  $\delta$  8.83 (d,  $J$  = 10.0 Hz, 1H), 8.09 (d,  $J$  = 2.0 Hz, 1H), 7.57 (d,  $J$  = 1.2 Hz, 2H), 7.55 (s, 1H), 7.40 (t,  $J$  = 6.8 Hz, 2H), 7.36 – 7.31 (m, 1H), 7.28 (s,  $J$  = 16.0 Hz, 1H), 7.11 (d,  $J$  = 16.4 Hz, 1H), 6.48 (d,  $J$  = 10.0 Hz, 1H), 4.01 (s, 3H);  $^{13}\text{C}$  NMR (100 MHz,  $\text{CDCl}_3$ )  $\delta$  166.2, 160.0, 155.4, 141.2, 140.6, 136.2, 133.1, 129.1, 129.0, 128.0, 127.2, 126.1, 125.6, 118.2, 117.7, 117.4, 52.8; IR  $\nu_{\text{max}}$  (neat,  $\text{cm}^{-1}$ ): 1732, 1713, 1601, 1433, 1302, 1219, 1194, 1134, 1115, 1034, 980, 833, 694; HRMS: (ESI) for  $\text{C}_{19}\text{H}_{15}\text{O}_4^+$   $[\text{M}+\text{H}]^+$ : calcd 307.0965 found 307.0973.

### Methyl 7-methyl-2-oxo-2H-chromene-5-carboxylate (**5t**)

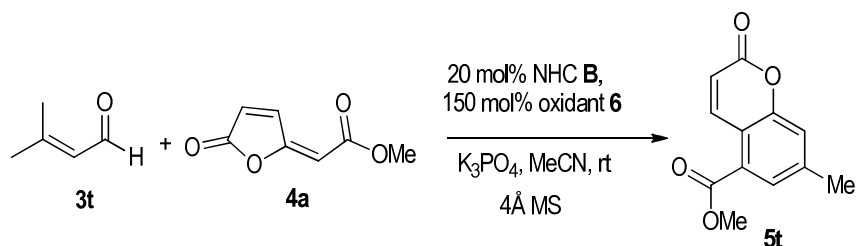

Under Ar atmosphere, a solution of enal **3t** (0.23 ml, 2.4mmol) and **4a** (308mg, 2.0 mmol), oxidant **6** (1.49 g, 3.6mmol),  $K_3PO_4$  (510mg, 2.4mmol), activated 4Å MS (300mg) and NHC pre-catalyst **B** (126 mg, 0.4mmol) in 20 mL MeCN was stirred at rt for 48 hours. The mixture was concentrated under reduced pressure and purified by silica gel column chromatography to afford the corresponding product **5t** (86.2mg, 40%) as a yellow solid, all analytical data of **5t** are in agreement with the reported data;<sup>3</sup> mp 145–146 °C (lit. mp 144.5–144.9 °C);  $^1H$  NMR (400 MHz,  $CDCl_3$ )  $\delta$  8.81 (d,  $J = 10.0$  Hz, 1H), 7.75 (d,  $J = 1.1$  Hz, 1H), 7.30 (s, 1H), 6.45 (d,  $J = 10.0$  Hz, 1H), 3.96 (s, 3H), 2.47 (s, 3H);  $^{13}C$  NMR (100 MHz,  $CDCl_3$ )  $\delta$  166.4, 160.1, 155.0, 142.2, 141.4, 128.6, 127.4, 121.5, 117.1, 116.4, 52.7, 21.7; IR  $\nu_{max}$  (neat,  $cm^{-1}$ ): 1740, 1717, 1612, 1308, 1254, 1111, 1308, 837; HRMS: (ESI) for  $C_{12}H_{11}O_4^+$   $[M+H]^+$ : calcd 219.0652, found 219.0661.

### Total Synthesis of Defucogilvocarcins

Phthalide **7** is a commercial available compound used as reagents in other reports<sup>3</sup>, and can be prepared in 2 steps synthesis from substituted amide using literature methods<sup>4</sup>.

### (*E*)-6-hydroxy-7-(methoxymethoxy)-2-styrylbenzo[h]chromeno[5,4,3-cde]chromene-5,12-dione (**8a**)<sup>3</sup>

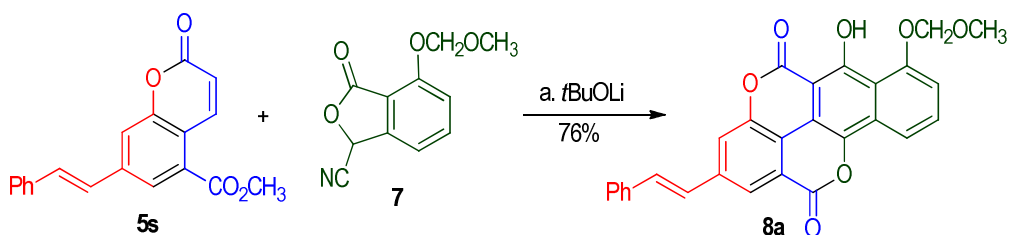

Compound (**8a**) was prepared as a yellow solid in 76% yield (177 mg) from coumarin **5s** (153 mg, 0.50mmol) and phthalide **7** (120 mg, 0.55 mmol), following the procedure of described in synthesis of **8b**. mp 280°C→black;  $^1\text{H}$  NMR (400 MHz,  $\text{CDCl}_3$ )  $\delta$  12.17 (s, 1H), 8.36 (d,  $J$  = 1.2 Hz, 1H), 8.20 (dd,  $J$  = 8.4, 1.0 Hz, 1H), 7.80 – 7.74 (m, 2H), 7.62 – 7.56 (m, 2H), 7.42 (t,  $J$  = 7.2 Hz, 2H), 7.39 – 7.32 (m, 3H), 7.22 (d,  $J$  = 16.4 Hz, 1H), 5.46 (s, 2H), 3.64 (s, 3H); IR  $\nu_{\text{max}}$  (neat,  $\text{cm}^{-1}$ ): 1730, 1676, 1647, 1616, 1377, 1199, 1107, 988, 752; HRMS: (ESI) for  $\text{C}_{28}\text{H}_{19}\text{O}_7^+ [\text{M}+\text{H}]^+$ : calcd467.1125, found 467.1120. (Due to the poor solubility of the product in various solvents,  $^{13}\text{C}$  NMR cannot be detected)

**(E)-10,12-dimethoxy-1-(methoxymethoxy)-8-styryl-6H-dibenzo[*c,h*]chromen-6-one (9a)<sup>5</sup>**

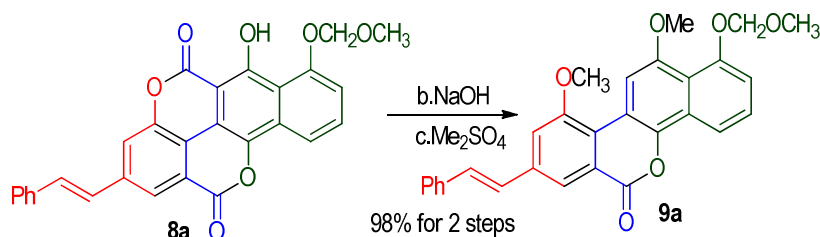

To a Schlenk tube equipped with a magnetic stir bar, was added 1 *N* NaOH (4 ml) and 1,4-dioxane (4 ml), the resulting mixture was degassed (three freeze-pump-thaw cycles) and the reaction tube was refilled with Ar. To this solution was added **8a** (100 mg, 0.21mmol) in glove box. The reaction mixture was stirred at 60°C for 5 h when the yellow suspension turns to a clear yellow solution, and then cooled to 0°C. It was quenched with saturated 1 *N* HCl and extracted with DCM (3 x 10 mL). The combined organic layers were dried over  $\text{Na}_2\text{SO}_4$ , filtered and concentrated under reduced pressure, the desired product was used without further purification as a yellow solid.

To a solution of this yellow solid in dry acetone, was added  $\text{Me}_2\text{SO}_4$  (1 ml) and  $\text{K}_2\text{CO}_3$  (2 g) at rt. The reaction mixture was stirred at 50 °C overnight, and then cooled to rt. The mixture was filtered, washed with acetone and the volatiles were removed under reduced pressure afforded as a yellow suspension. Then the resulting suspension was filtered, the filter cake was washed with water and acetone, then dried in vacuum to yield **9a** (96 mg, 98% yield for 2 steps) as a yellow solid. mp 285 °C→black;

$^1\text{H}$  NMR (400 MHz,  $\text{CDCl}_3$ )  $\delta$  8.32 (s, 1H), 8.27 (dd,  $J$  = 8.4, 0.8 Hz, 1H), 8.20 (d,  $J$  = 1.6 Hz, 1H), 7.57 – 7.51 (m, 2H), 7.47 (t,  $J$  = 8.0 Hz, 1H), 7.39 (t,  $J$  = 7.6 Hz, 2H), 7.36 – 7.29 (m, 2H), 7.23 (d,  $J$  = 16.4 Hz, 1H), 7.18 (dd,  $J$  = 7.6, 0.8 Hz, 1H), 7.10 (d,  $J$  = 16.4 Hz, 1H), 5.28 (s, 2H), 4.11 (s, 3H), 3.99 (s, 3H), 3.63 (s, 3H);  $^{13}\text{C}$  NMR (100 MHz,  $\text{CDCl}_3$ )  $\delta$  161.5, 157.7, 153.8, 152.6, 141.0, 138.6, 136.7, 131.2, 129.0, 128.5, 127.3, 126.96, 126.92, 126.86, 123.7, 123.6, 120.7, 118.9, 117.0, 115.5, 114.5, 113.6, 104.4, 97.1, 56.67, 56.64, 56.4; IR  $\nu_{\text{max}}$  (neat,  $\text{cm}^{-1}$ ): 1726, 1589, 1390, 1375, 1256, 1229, 1130, 1022, 781; HRMS: (ESI) for  $\text{C}_{29}\text{H}_{25}\text{O}_6^+$   $[\text{M}+\text{H}]^+$ : calcd 469.1646, found 469.1646.

**10,12-dimethoxy-1-(methoxymethoxy)-6-oxo-6H-dibenzo[c,h]chromene-8-carbaldehyde (10)**

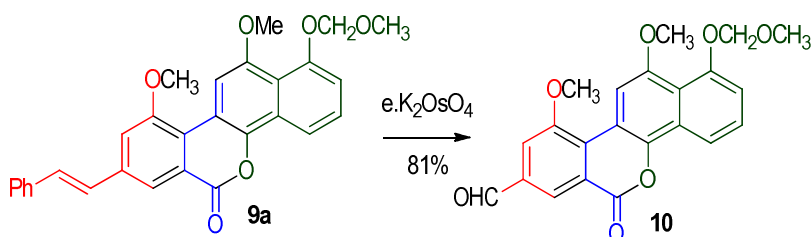

To a suspension of **9a** (50 mg, 0.107 mmol) in THF (6 mL) and  $\text{H}_2\text{O}$  (6 mL) was  $\text{K}_2\text{OsO}_4 \cdot 2\text{H}_2\text{O}$  (1 mg, 0.002 mmol) and  $\text{NaIO}_4$  (92 mg, 0.428 mmol) at  $0^\circ\text{C}$ . The reaction was stirred at rt overnight then quenched with saturated aqueous  $\text{Na}_2\text{S}_2\text{O}_3$  (10 mL). The layers were separated and the aqueous phase was extracted with DCM (3 x 10 mL), the combined organic layers were dried over  $\text{Na}_2\text{SO}_4$ , filtered and concentrated under reduced pressure. The residue was triturated with  $\text{Et}_2\text{O}$  ( $2 \times 1\text{ mL}$ ) to afford **10** (35 mg, 83%) as a yellow solid. All analytical data of **10** are in agreement with the reported data<sup>7a</sup>. mp  $195\text{--}198^\circ\text{C}$  (lit. mp<sup>7a</sup>  $200\text{--}203^\circ\text{C}$ );  $^1\text{H}$  NMR (400 MHz,  $\text{CDCl}_3$ )  $\delta$  10.00 (s, 1H), 8.44 (d,  $J$  = 1.6 Hz, 1H), 8.28 (s, 1H), 8.23 (dd,  $J$  = 8.4, 0.8 Hz, 1H), 7.65 (d,  $J$  = 1.2 Hz, 1H), 7.50 (t,  $J$  = 8.0 Hz, 1H), 7.23 (dd,  $J$  = 7.6, 0.8 Hz, 1H), 5.30 (s, 2H), 4.10 (s, 3H), 4.00 (s, 3H), 3.64 (s, 3H);  $^{13}\text{C}$  NMR (100 MHz,  $\text{CDCl}_3$ )  $\delta$  190.3, 160.3, 157.8, 153.7, 152.7, 142.3, 136.1, 129.7, 127.5, 127.0, 126.5, 123.5, 119.5, 117.0, 116.1, 112.63, 112.61, 103.7, 96.9, 56.6, 56.5, 56.4; IR  $\nu_{\text{max}}$  (neat,  $\text{cm}^{-1}$ ): 1732, 1703, 1665, 1587, 1452, 1393, 1117, 1059, 1013; HRMS: (ESI) for  $\text{C}_{22}\text{H}_{18}\text{O}_7\text{Na}^+$   $[\text{M}+\text{Na}]^+$ : calcd 417.0945, found 417.0958.

### Defucogivocarcin V (2c)

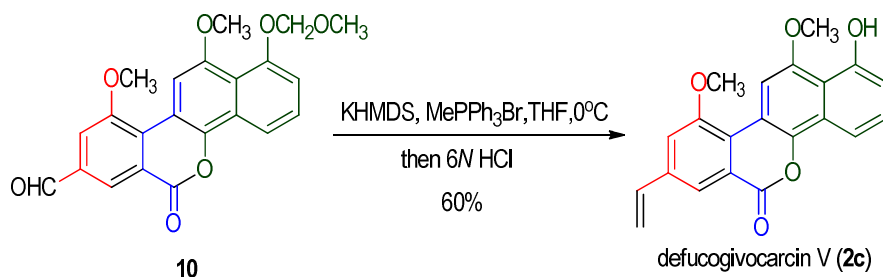

To a suspension of MePPh<sub>3</sub>Br (132mg, 0.368mmol) in THF (6 mL) was added KHMDs (0.7M in PhMe, 0.53 mL, 0.368mmol) at 0 °C and stirring was continued for 15 min. A solution of **10** (29 mg, 0.074 mmol) in THF (2 mL) was added dropwise and the mixture was stirred for 2h at 0 °C and then quenched with 6NHCl (5 ml), the resulting mixture was stirred overnight at rt. The aqueous layer was extracted with DCM (3 x 10 mL) and the combined organic layers were then dried over Na<sub>2</sub>SO<sub>4</sub>, filtered and concentrated under reduced pressure. The residue was purified by flash column chromatography on silica gel (20 : 1 DCM/MeOH) to provide **2c** (15.5 mg, 60%) as a yellow solid. All analytical data of **2c** are in agreement with the reported data.<sup>7</sup> mp 263–266 °C (lit. mp<sup>7b</sup> 267–272 °C); <sup>1</sup>H NMR (400 MHz, CDCl<sub>3</sub>) δ 9.31 (s, 1H), 8.22 (s, 1H), 8.09 (d, *J* = 1.6 Hz, 1H), 8.04 (dd, *J* = 8.4, 0.8 Hz, 1H), 7.48 (t, *J* = 8.0 Hz, 1H), 7.27 (d, *J* = 1.2 Hz, 1H), 6.99 (dd, *J* = 8.0, 1.2 Hz, 1H), 6.77 (dd, *J* = 17.6, 10.8 Hz, 1H), 5.93 (d, *J* = 17.6 Hz, 1H), 5.45 (d, *J* = 10.8 Hz, 1H), 4.08 (s, 3H), 4.07 (s, 3H); <sup>13</sup>C NMR (100 MHz, CDCl<sub>3</sub>) δ 161.3, 157.5, 154.4, 152.0, 141.8, 138.8, 135.5, 128.7, 126.3, 123.8, 123.6, 120.8, 116.6, 115.0, 114.2, 113.6, 112.9, 101.8, 56.4, 56.2; IR ν<sub>max</sub> (neat, cm<sup>-1</sup>): 3339, 1721, 1605, 1385, 1238, 1167, 1065; HRMS: (ESI) for C<sub>21</sub>H<sub>16</sub>O<sub>5</sub>Na<sup>+</sup> [M+Na]<sup>+</sup>: calcd 371.0890, found 371.0900.

### DefucogivocarcinE (2b)

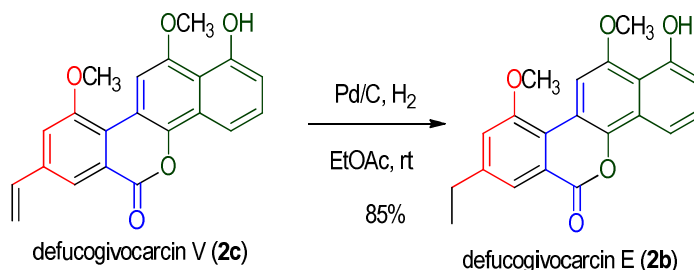

A solution of **2c** (8 mg, 0.023mmol) in EtOAc (3 mL) was treated with hydrogen in the presence of 10% Pd-C (2.4mg, 0.002mmol) at rt and stirred for 1.5h. The mixture was filtered through Celite, washed with EtOAc and the volatiles were removed under reduced pressure. The residue was triturated with Et<sub>2</sub>O (2 × 1 mL) to afford **2b** (6.8 mg, 85%) as a pale yellow solid. All analytical data of **2b** are in agreement with the reported data<sup>8</sup>. mp 254–256 °C(lit. mp<sup>8</sup> 255–256 °C); <sup>1</sup>H NMR (400 MHz, CDCl<sub>3</sub>) δ 9.36 (s, 1H), 8.33 (s, 1H), 8.08 (dd, *J* = 8.4, 1.2 Hz, 1H), 7.97 (d, *J* = 1.6 Hz, 1H), 7.49 (t, *J* = 8.0 Hz, 1H), 7.17 (d, *J* = 1.6 Hz, 1H), 7.00 (dd, *J* = 7.6, 0.8 Hz, 1H), 4.11 (s, 3H), 4.08 (s, 3H), 2.80 (q, *J* = 7.6 Hz, 2H), 1.35 (t, *J* = 7.6 Hz, 3H); <sup>13</sup>C NMR (100 MHz, CDCl<sub>3</sub>) δ 161.5, 157.3, 154.3, 152.0, 146.3, 141.5, 128.6, 126.4, 123.4, 122.2, 121.8, 117.3, 114.8, 113.6, 113.1, 112.6, 102.0, 56.4, 56.2, 29.1, 15.3; IR  $\nu_{\text{max}}$  (neat, cm<sup>-1</sup>): 3356, 1719, 1589, 1437, 1387, 1250, 1171, 1123, 1057; HRMS: (ESI) for C<sub>21</sub>H<sub>19</sub>O<sub>5</sub>[M+H]<sup>+</sup>: calcd351.1227, found 351.1228.

### 6-hydroxy-7-(methoxymethoxy)-2-methylbenzo[h]chromeno[5,4,3-cde]chromene-5,12-dione (**8b**)<sup>3</sup>

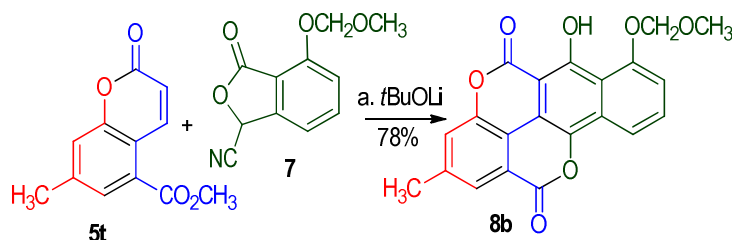

To a stirred solution of <sup>t</sup>BuOH (124 μL, 1.36 mmol) in THF (3 mL) at -60 °C was added <sup>n</sup>BuLi (2.0 M in cyclohexane, 0.68 mL, 1.36mmol) and stirring for 10 min. Then a solution of a phthalide **7**<sup>4</sup> (90 mg, 0.41mmol) in THF (1 mL) was added dropwise. The resulting yellowish solution was stirred at -60 °C for 40 min, after which a solution of coumarin **5t** (90 mg, 0.41



mmol) in THF (5 mL) was added to it. The cooling bath was removed after about 1 h at -60 °C and the reaction mixture was brought to rt over a period of 1 h and further stirred overnight. The reaction was then quenched with saturated aqueous NH<sub>4</sub>Cl (15 mL) and stirred for 30 min at rt. The THF was removed in vacuum and the resulting suspension was filtered. The filter cake was washed with water and acetone, then dried in vacuum to yield the pure product **8b** (121 mg, 78%) as a yellow solid. mp 265 °C → black; <sup>1</sup>H NMR (400 MHz, CDCl<sub>3</sub>) δ 12.18 (s, 1H), 8.20 (dd, *J* = 8.4, 1.0 Hz, 1H), 8.06 (s, 1H), 7.76 (t, *J* = 8.0 Hz, 1H), 7.51 (s, 1H), 7.34 (dd, *J* = 8.0, 1.0 Hz, 1H), 5.45 (s, 2H), 3.64 (s, 3H), 2.61 (s, 3H); IR ν<sub>max</sub> (neat, cm<sup>-1</sup>): 3160, 1701, 1624, 1400, 1223, 1107, 976, 752; HRMS: (ESI) for C<sub>21</sub>H<sub>14</sub>O<sub>7</sub>Na<sup>+</sup> [M+Na]<sup>+</sup>: calcd 401.0632, found 401.0618. (Due to the poor solubility of the product in various solvents, <sup>13</sup>C NMR cannot be detected)

#### 10,12-dimethoxy-1-(methoxymethoxy)-8-methyl-6H-dibenzo[c,h]chromen-6-one (**9b**)<sup>5</sup>

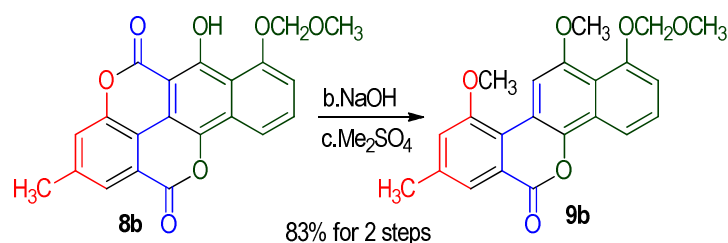

To a Schlenk tube equipped with a magnetic stir bar, was added 1N NaOH (4 mL) and 1,4-dioxane (4 mL), the resulting mixture was degassed (three freeze-pump-thaw cycles) and the reaction tube was refilled with Ar. To this solution was added **8b** (80 mg, 0.21 mmol) in glovebox. The reaction mixture was stirred at 60 °C for 5 h when the yellow suspension turns to a clear yellow solution, and then cooled to 0 °C. It was quenched with saturated 1N HCl and extracted with DCM (3 x 10 mL). The combined organic layers were dried over Na<sub>2</sub>SO<sub>4</sub>, filtered and concentrated under reduced pressure, the desired product was used without further purification as a yellow solid.

To a solution of this yellow solid in dry acetone, was added Me<sub>2</sub>SO<sub>4</sub> (1 mL) and K<sub>2</sub>CO<sub>3</sub> (2 g) at rt. The reaction mixture was stirred at 50 °C overnight, and then cooled to rt. The mixture was filtered, washed with acetone and the volatiles were removed under reduced pressure afforded

as a yellow suspension. Then the resulting suspension was filtered, the filter cake was washed with water and acetone, then dried in vacuum to yield **9b** (66.3 mg, 83% for two steps) as a yellow solid. mp 195–198 °C;  $^1\text{H}$  NMR (400 MHz,  $\text{CDCl}_3$ )  $\delta$  8.32 (s, 1H), 8.28 (d,  $J$  = 8.4 Hz, 1H), 7.87 (s, 1H), 7.49 (t,  $J$  = 8.0 Hz, 1H), 7.20 (d,  $J$  = 7.6 Hz, 1H), 7.06 (s, 1H), 5.29 (s, 2H), 4.02 (s, 3H), 3.98 (s, 3H), 3.63 (s, 3H), 2.45 (s, 3H);  $^{13}\text{C}$  NMR (100 MHz,  $\text{CDCl}_3$ )  $\delta$  161.5, 157.2, 153.7, 152.5, 140.6, 139.9, 127.2, 126.9, 123.2, 122.8, 122.0, 118.7, 118.2, 117.0, 115.4, 113.7, 104.5, 97.1, 56.6, 56.3, 21.7; IR  $\nu_{\text{max}}$  (neat,  $\text{cm}^{-1}$ ): 1720, 1589, 1334, 1153, 1061, 1018; HRMS: (ESI) for  $\text{C}_{22}\text{H}_{21}\text{O}_6$   $[\text{M}+\text{H}]^+$ : calcd 381.1333, found 381.1320.

### Defucogivocarcin M (**2a**)

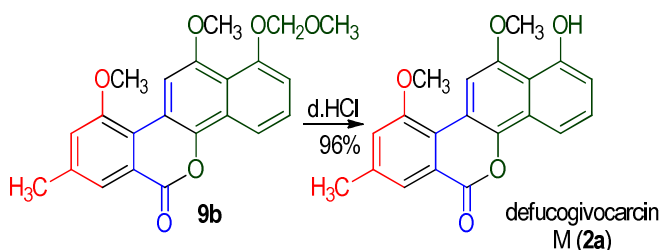

To a suspension of **9b** (18 mg, 0.047 mmol) in MeOH (2 mL) was added 6 *N* HCl (0.2 mL) at rt. The reaction mixture was stirred at 50°C for 2 h. The reaction was diluted with DCM (20 mL) and washed with saturated aqueous NaCl (2 x 10 mL), the combined organic layers were dried over  $\text{Na}_2\text{SO}_4$ , filtered and concentrated under reduced pressure to yield **2a** (15.3 mg, 96%) as a yellow solid. All analytical data of **2a** are in agreement with the reported data<sup>6</sup>. mp 284–286 °C (lit. mp<sup>6a</sup> 289–291 °C);  $^1\text{H}$  NMR (400 MHz,  $\text{CDCl}_3$ )  $\delta$  9.34 (s, 1H), 8.26 (s, 1H), 8.05 (dd,  $J$  = 8.4, 0.8 Hz, 1H), 7.90 (d,  $J$  = 0.8 Hz, 1H), 7.48 (t,  $J$  = 8.4 Hz, 1H), 7.09 (d,  $J$  = 1.2 Hz, 1H), 6.99 (dd,  $J$  = 7.6, 0.8 Hz, 1H), 4.09 (s, 3H), 4.05 (s, 3H), 2.48 (s, 3H);  $^{13}\text{C}$  NMR (100 MHz,  $\text{CDCl}_3$ )  $\delta$  161.4, 157.1, 154.3, 151.9, 141.4, 140.0, 128.6, 126.3, 123.2, 122.9, 121.9, 118.2, 114.8, 113.5, 113.1, 112.5, 101.9, 56.3, 56.1, 21.8; IR  $\nu_{\text{max}}$  (neat,  $\text{cm}^{-1}$ ): 3372, 1720, 1512, 1260, 602; HRMS: (ESI) for  $\text{C}_{20}\text{H}_{17}\text{O}_5$   $[\text{M}+\text{H}]^+$ : calcd 337.1071, found 337.1068.

### III: References

- (a) Mo, J.; Chen, X.; Chi, Y. R. *J. Am. Chem. Soc.* **2012**, *134*, 8810–8813; (b) Wiech, N. L.; Lan, L.; Hsuan, Y. *WO2006052916*, **2006**.

2. (a) Chen, W.; Ye, C.; Wang, Y.; Sun, P. *HuaxueTongbao*, **2009**, 72, 438-443; (b) Chen, Y.; Yu, H.; Shie, J.; Cheng, T. R.; Wu, C.; Fang, J.; Wong, C. *Bioorg. Med. Chem.* **2014**, 22, 1766–1772.
3. Ueberschaar, N.; Xu, Z.; Scherlach, K.; Metsä-Ketelä, M.; Bretschneider, T.; Dahse, H-M.; Görls, H.; Hertweck, C. *J. Am. Chem. Soc.* **2013**, 135, 17408–17416.
4. Okazaki, K.; Nomura, K.; Yoshii, E. *Synth. Commun.* **1987**, 17, 1021–1027.
5. Sternbach, L. H.; Kaiser, S.; Goldberg, M. W. *J. Am. Chem. Soc.* **1958**, 80, 1639–1647.
6. (a) Takemura, I.; Imura, K.; Matsumoto, T.; Suzuki, K. *Org. Lett.* **2004**, 6, 2503–2505; (b) Sumida, Y.; Harada, R.; Kato-Sumida, T.; Johmoto, K.; Uekusa, H.; Hosoya T. *Org. Lett.* **2014**, 16, 6240–6243.
7. (a) Nandaluru, P. R.; Bodwell, G. J. *J. Org. Chem.* **2012**, 77, 8028–8037; (b) Petten, A. D.; Nguyen, N. H.; Danishefsky, S. J. *J. Org. Chem.* **1988**, 53, 1003–1007.
8. James, C. A.; Snieckus, V. *J. Org. Chem.* **2009**, 74, 4080–4093.

# <sup>1</sup>H NMR, <sup>13</sup>C NMR spectra of products

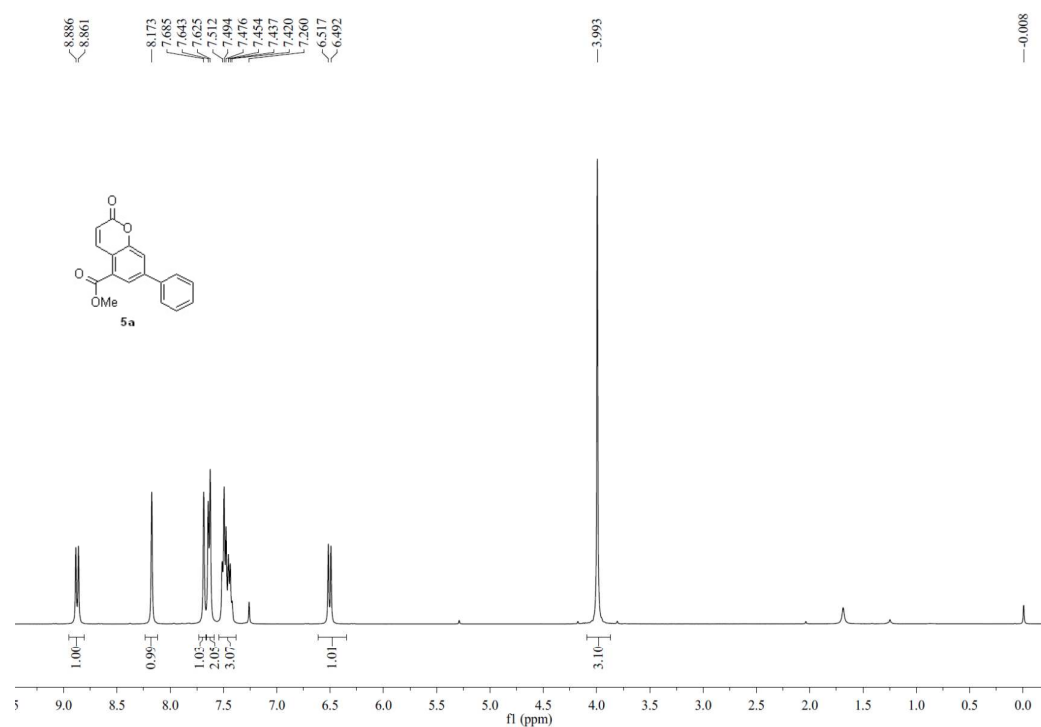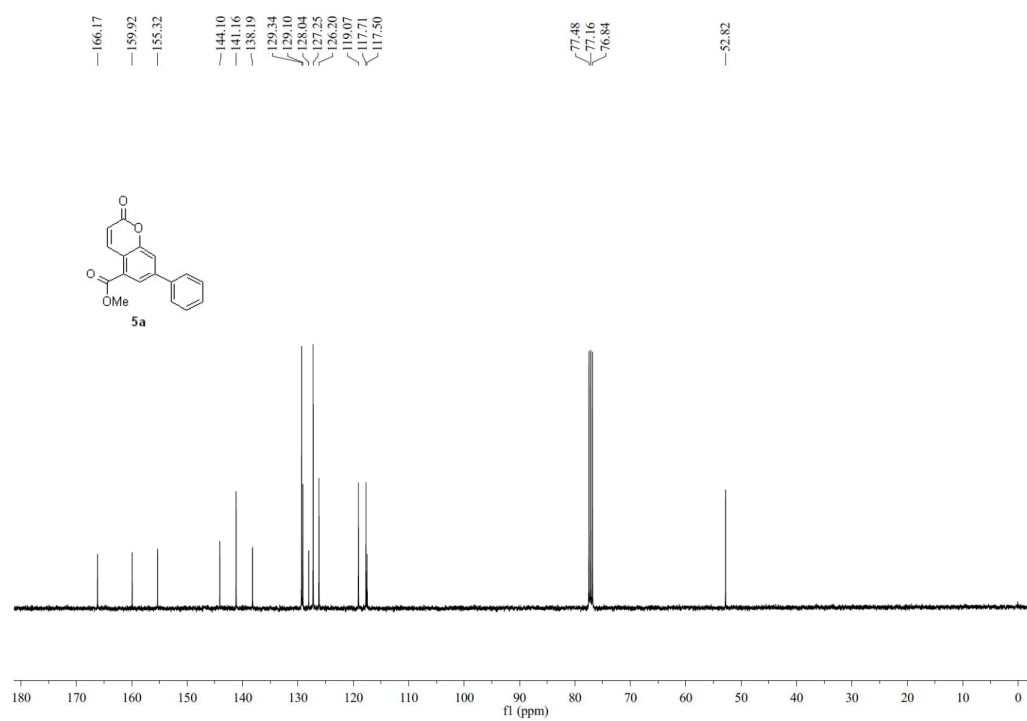

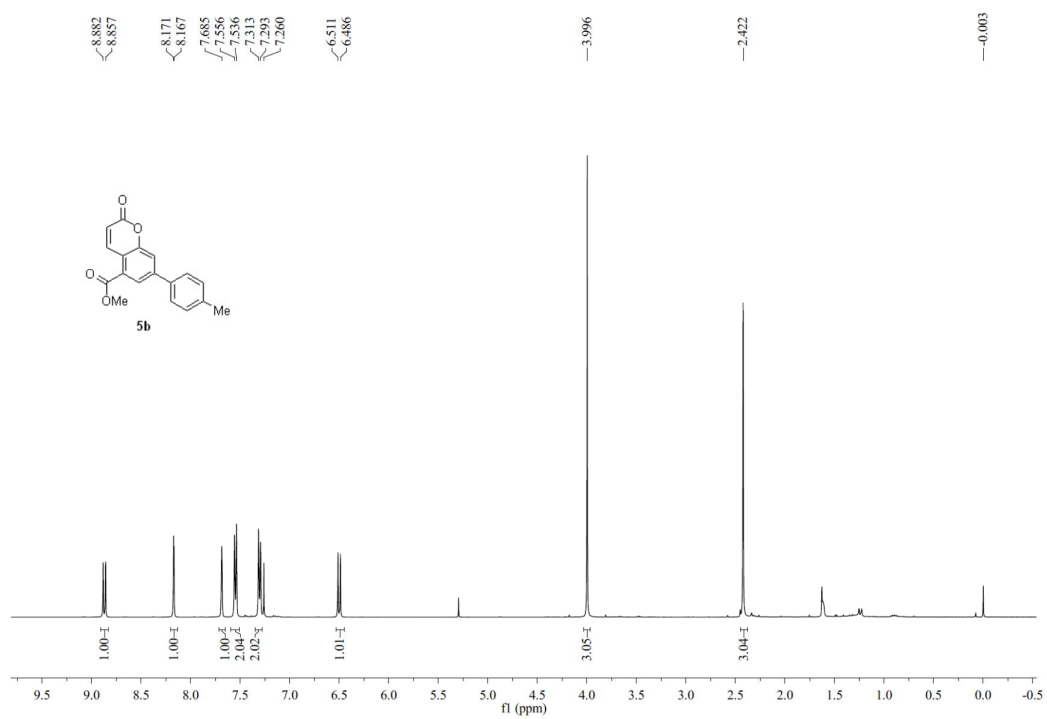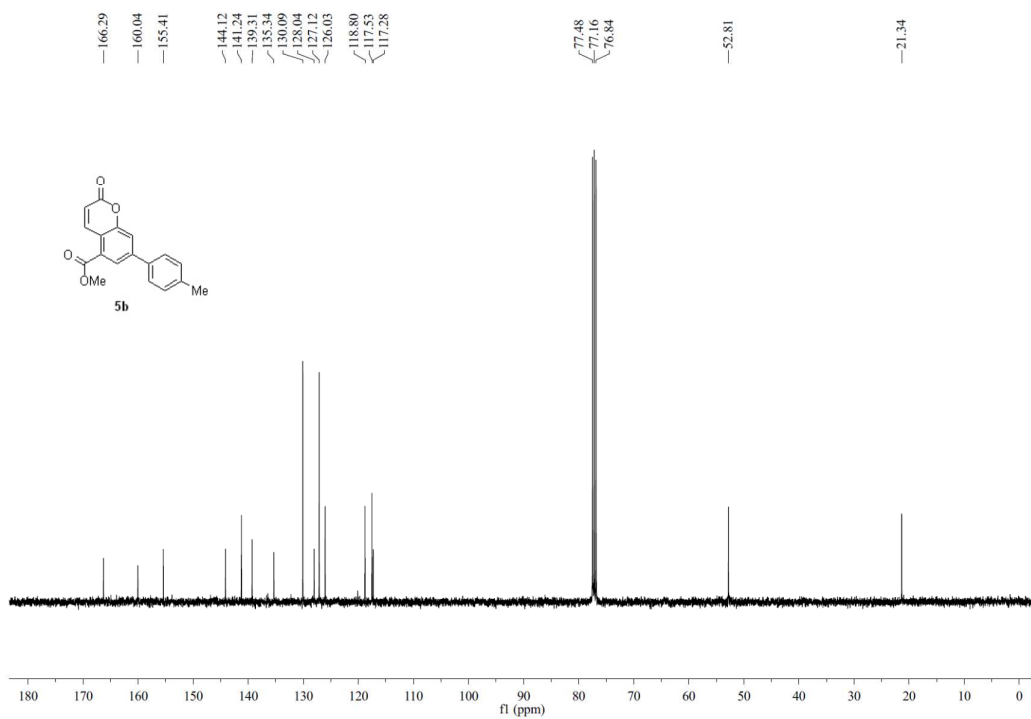

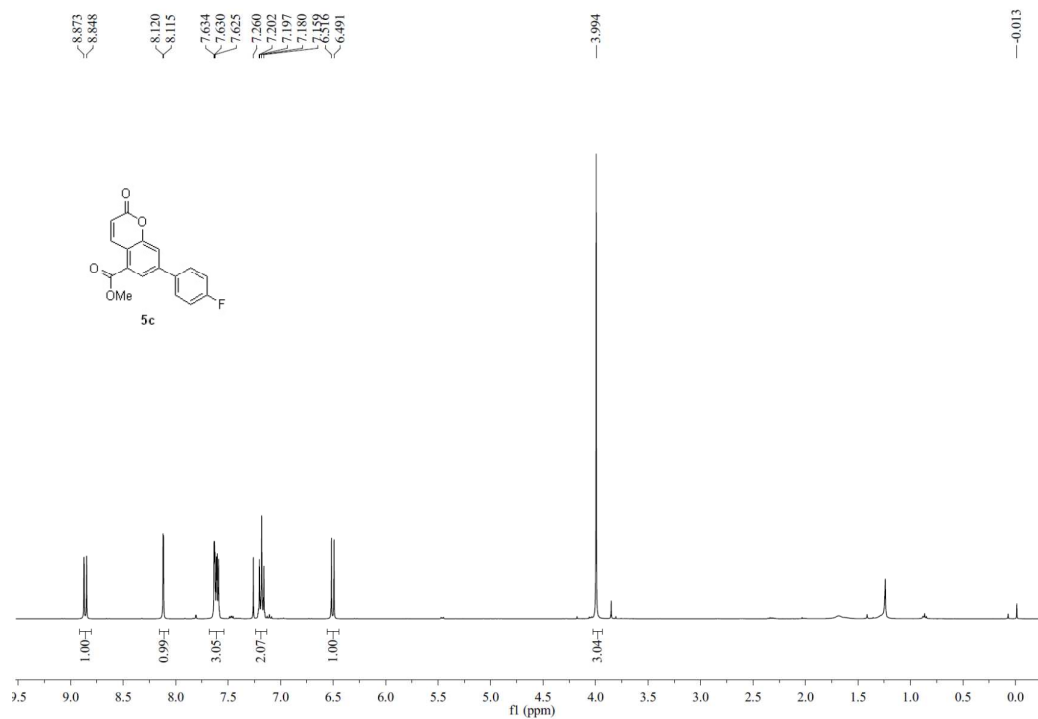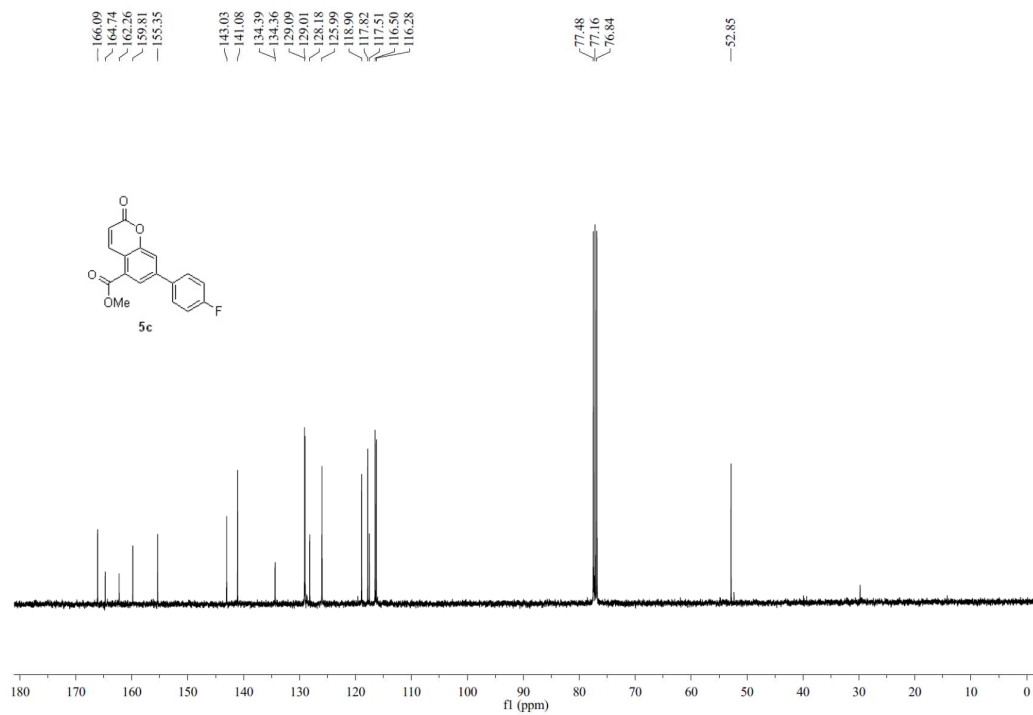

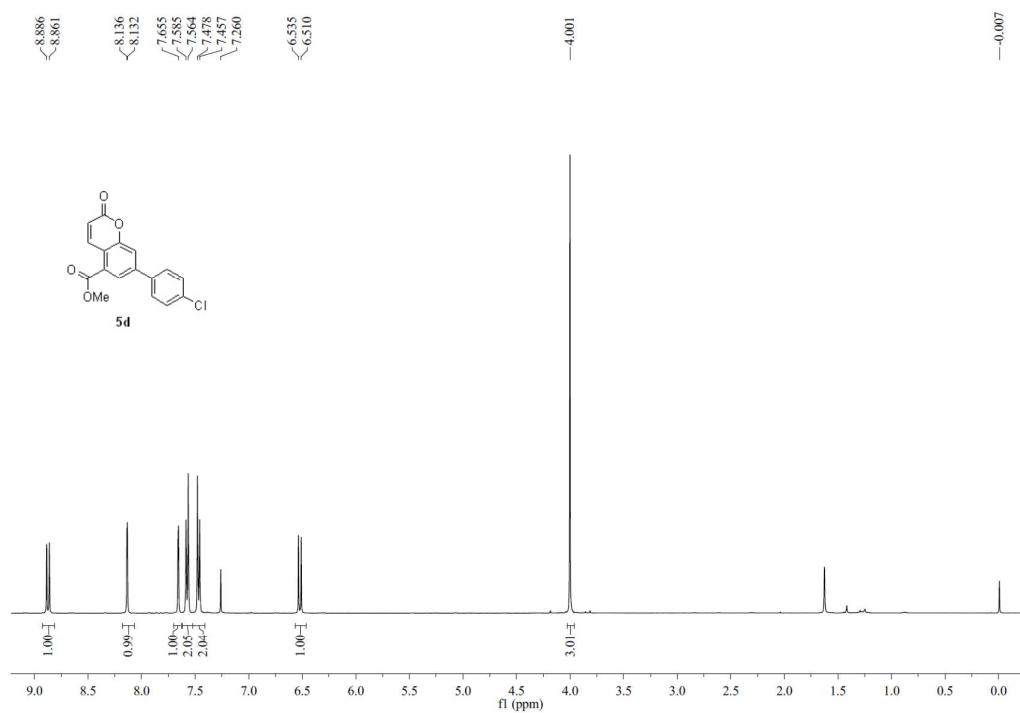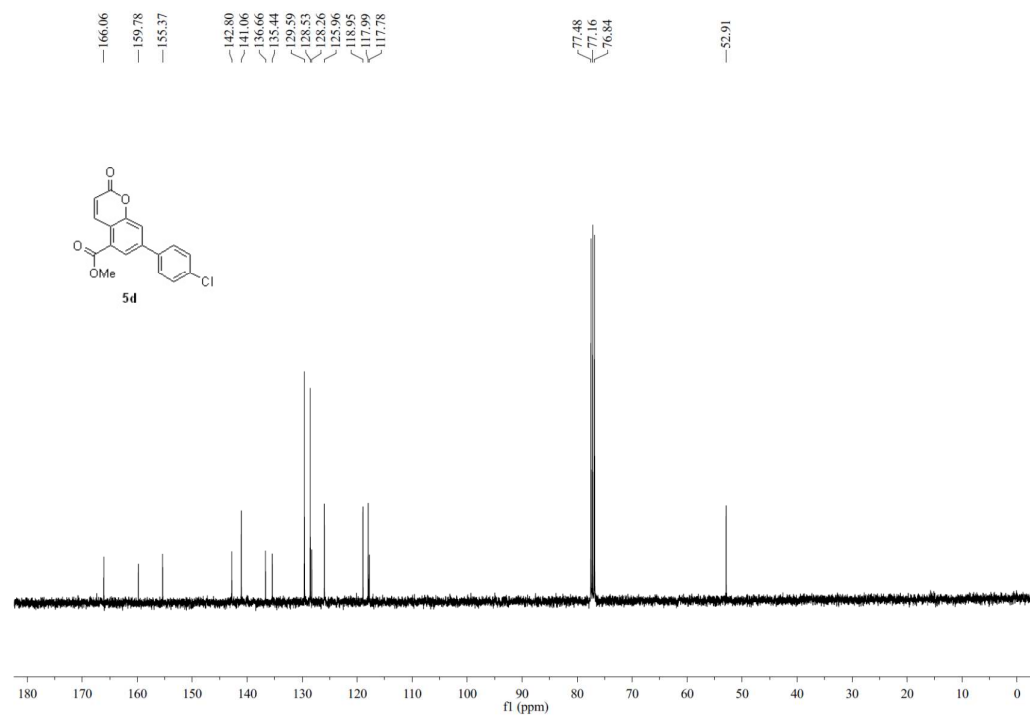

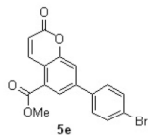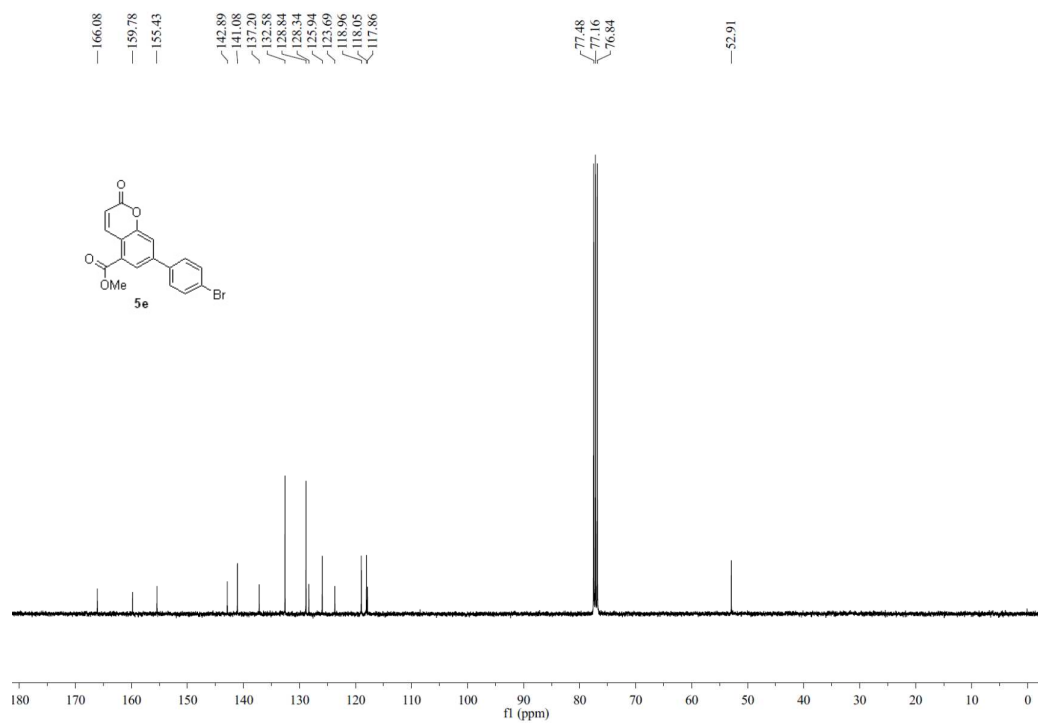



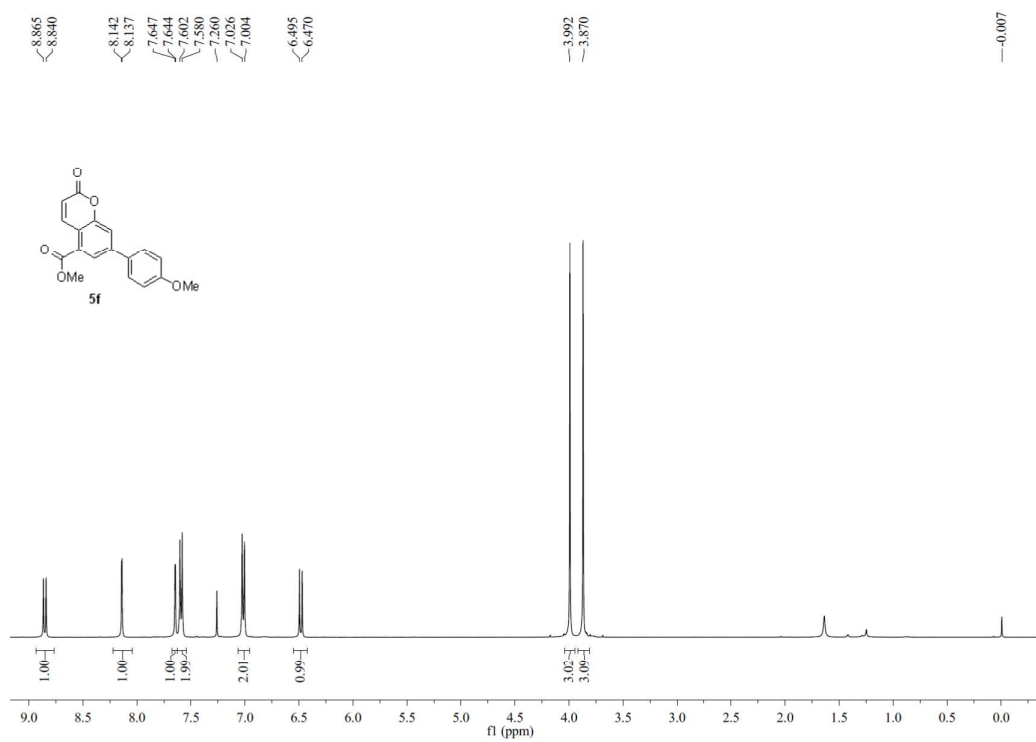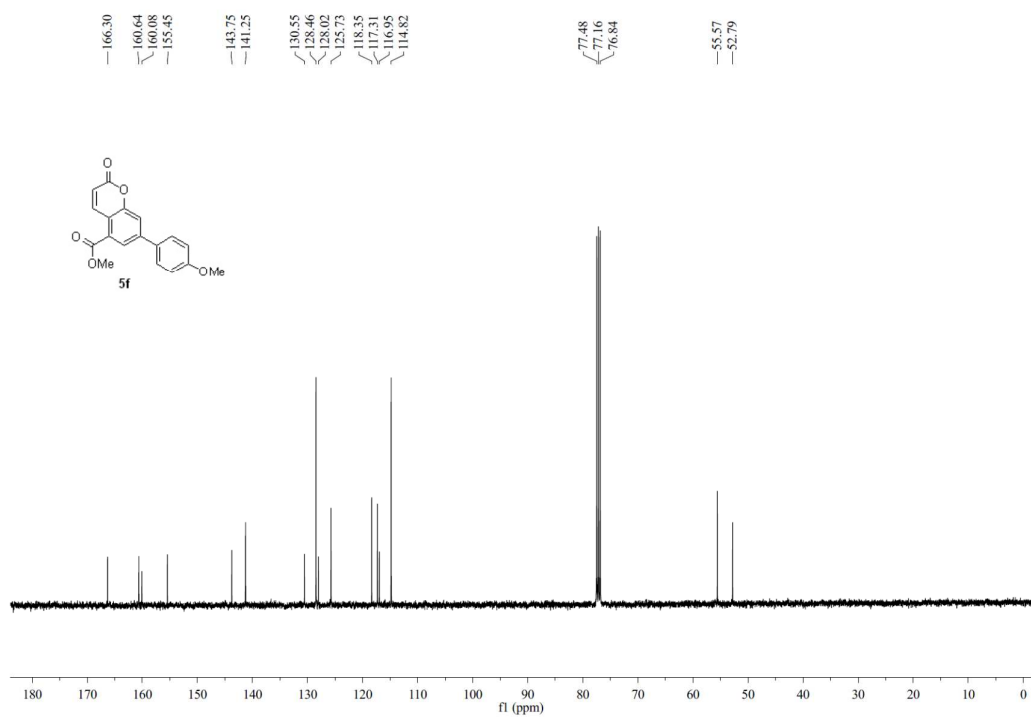

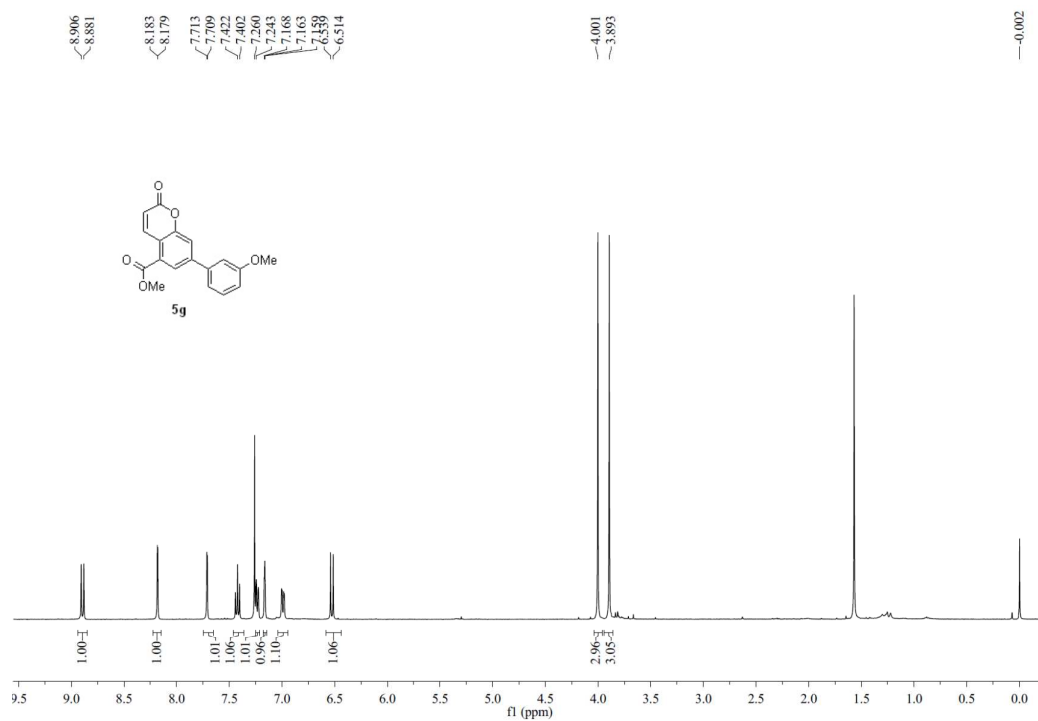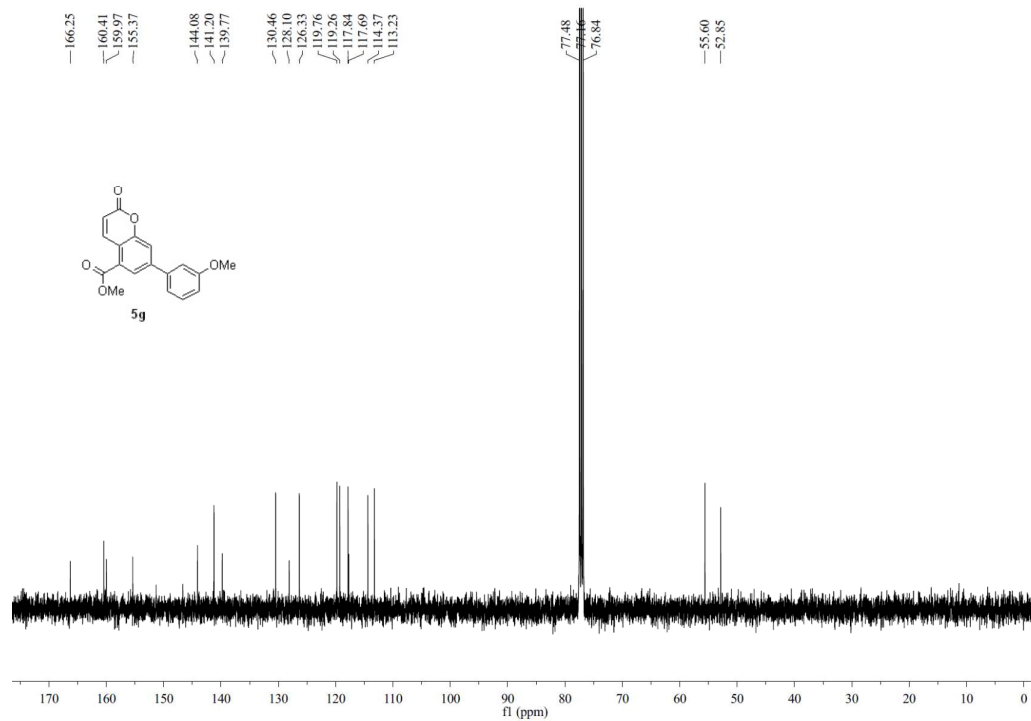

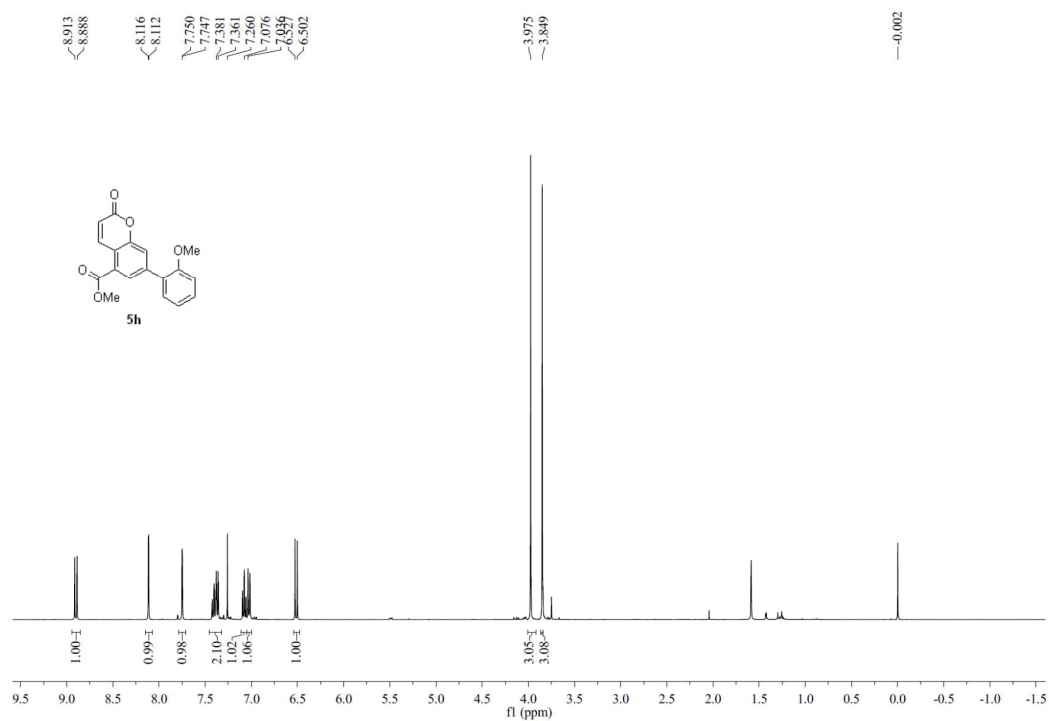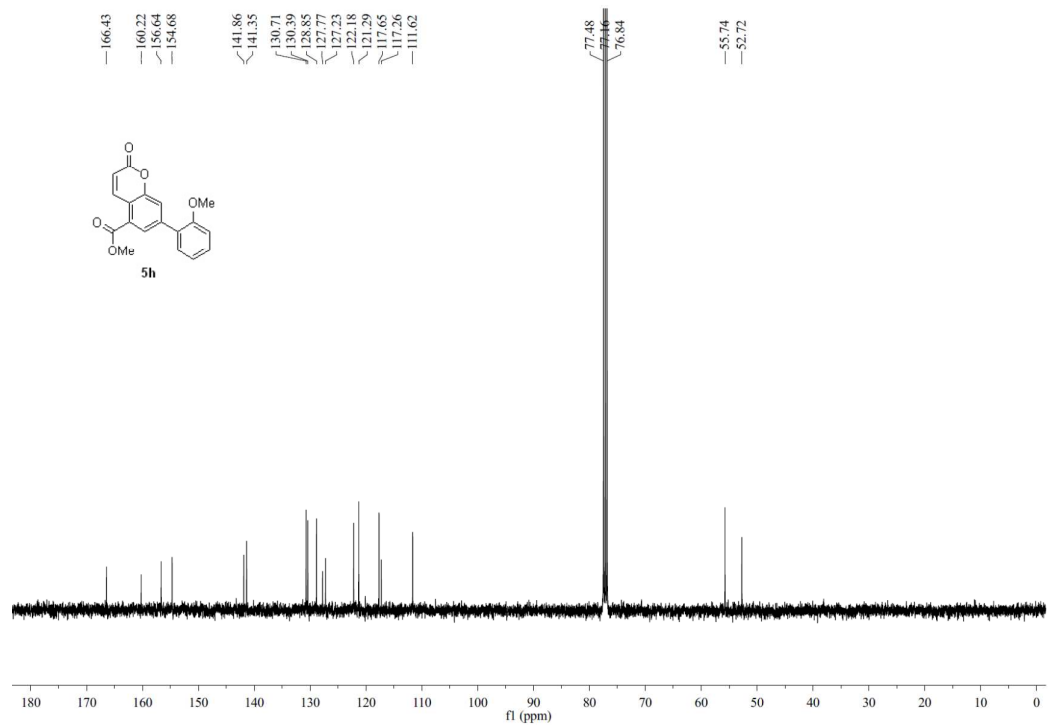

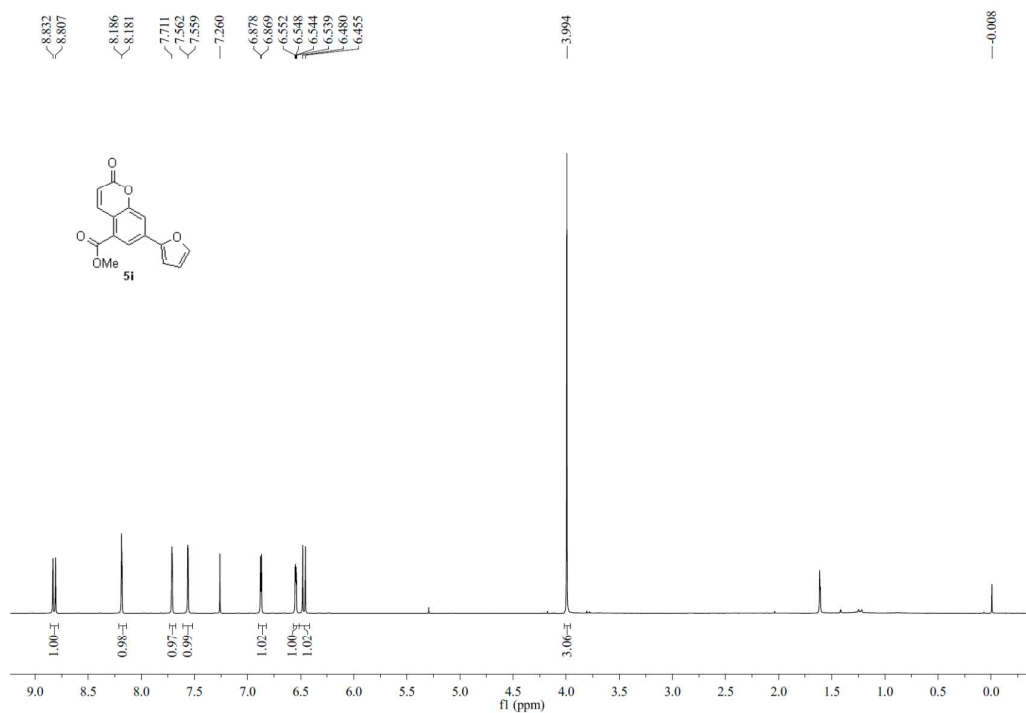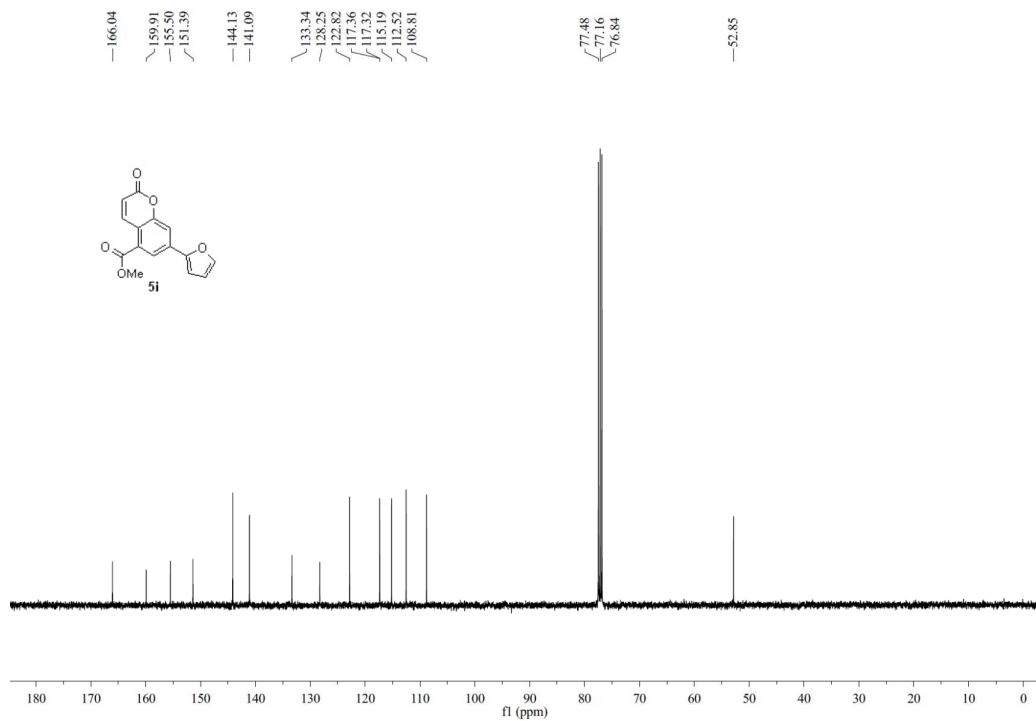

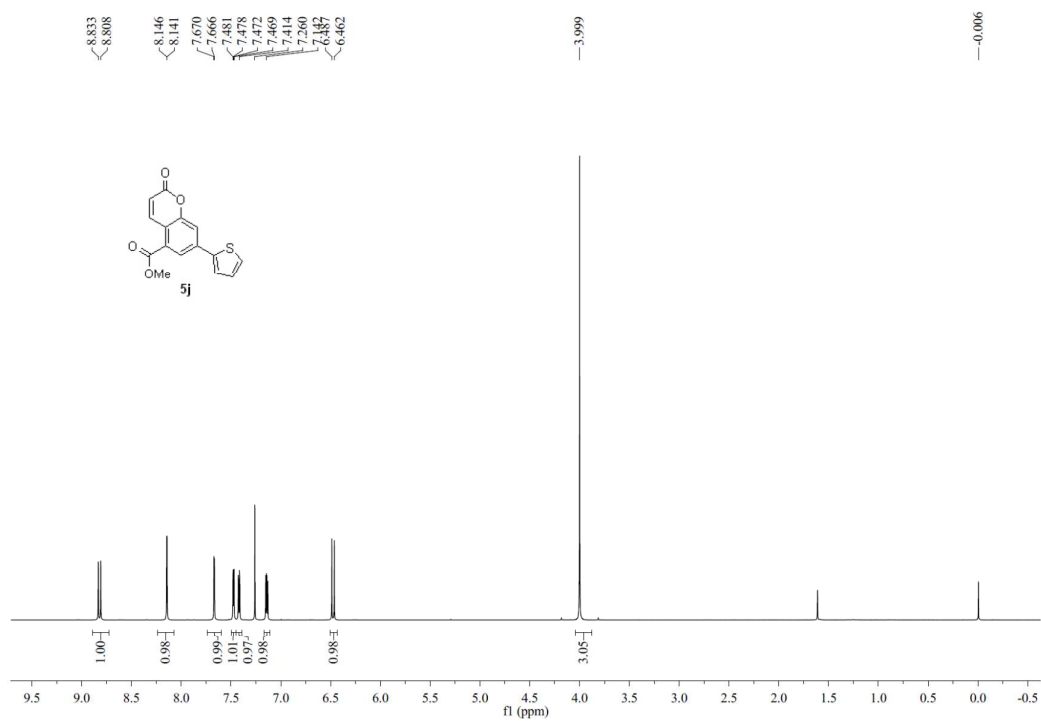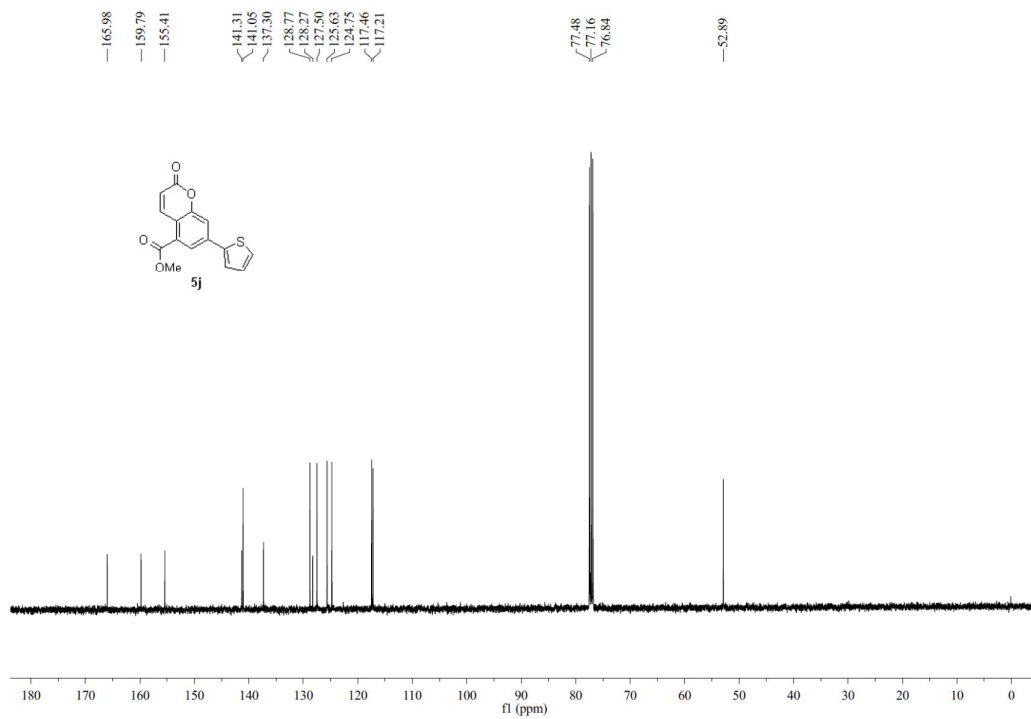

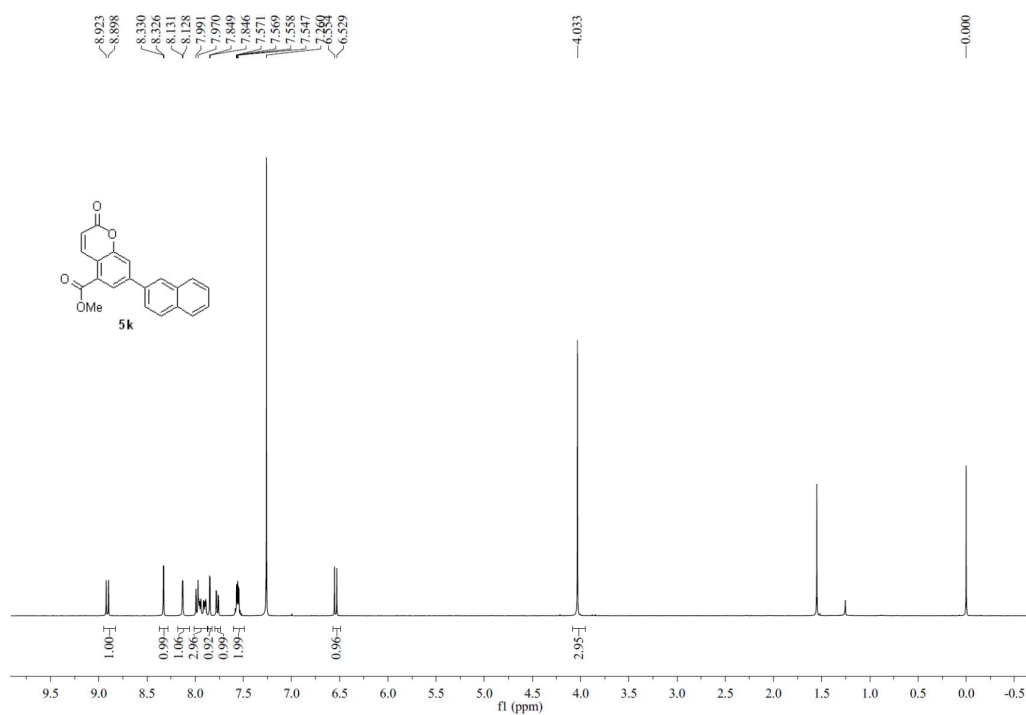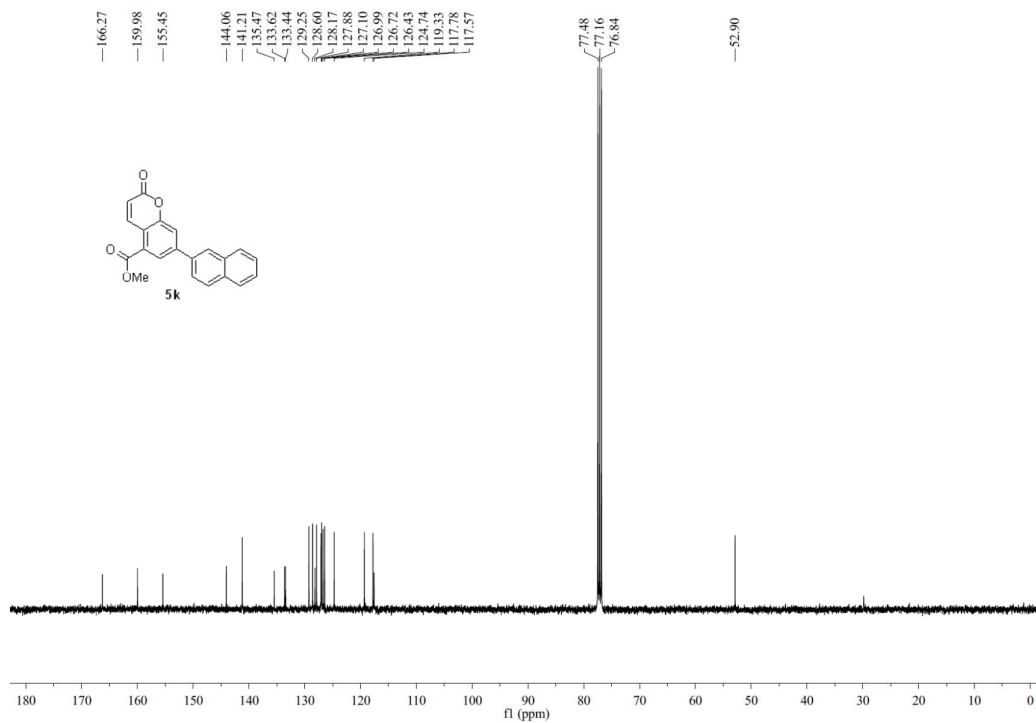

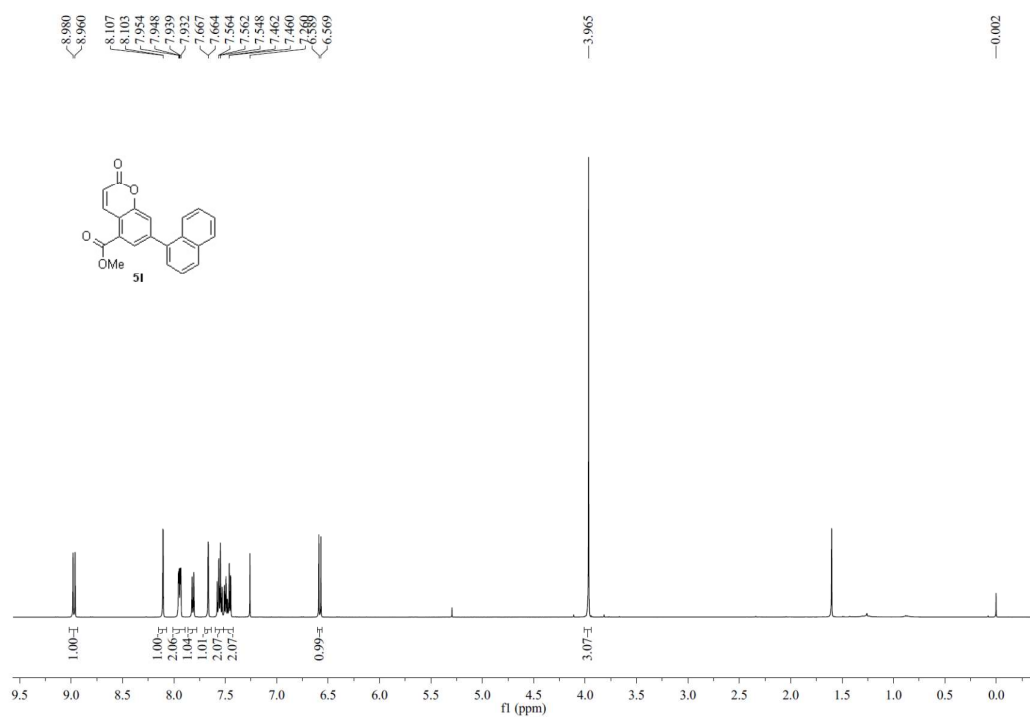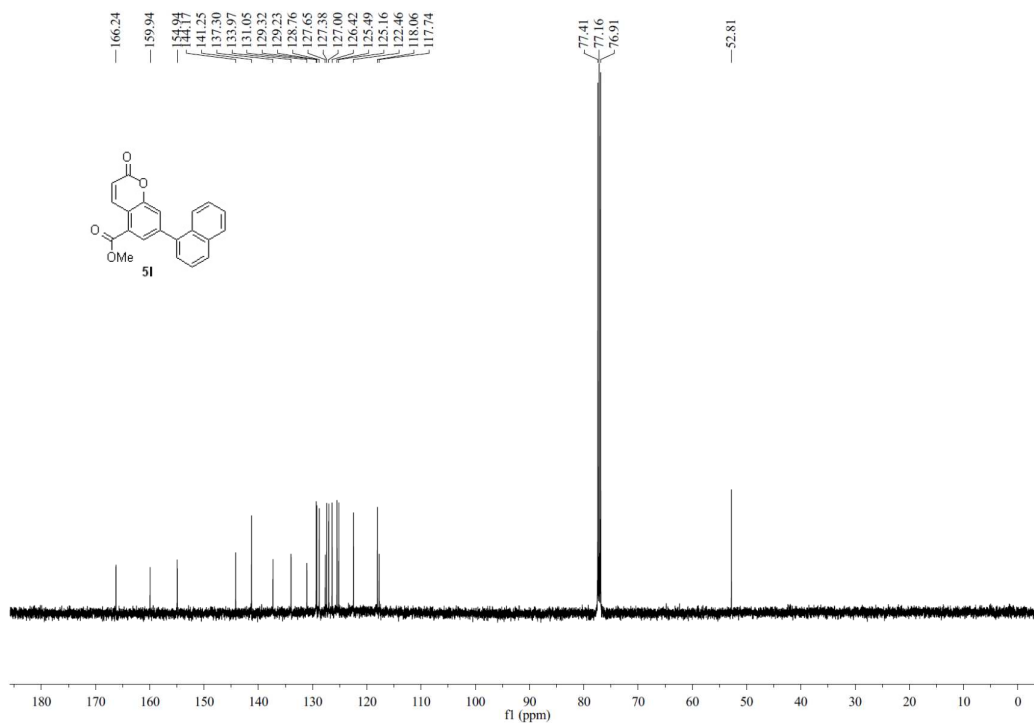

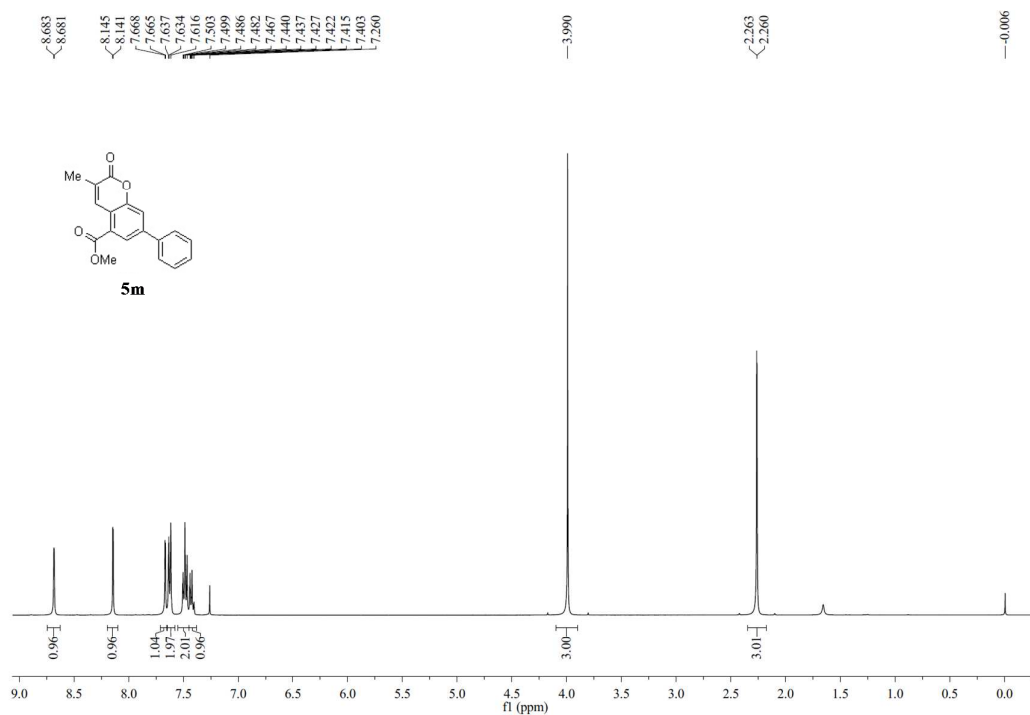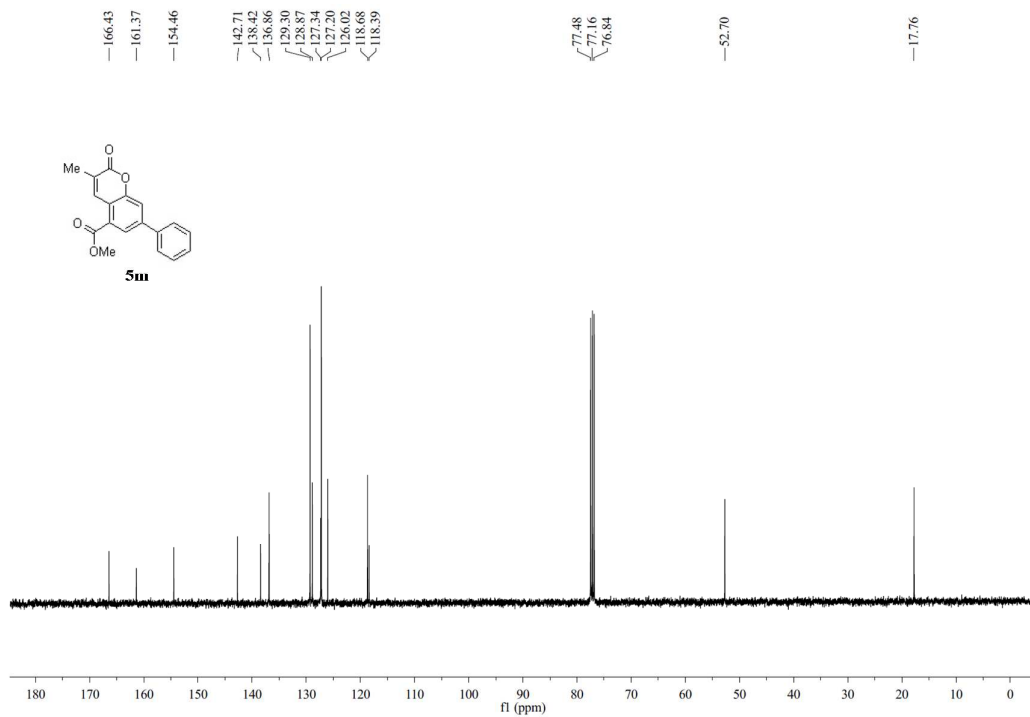



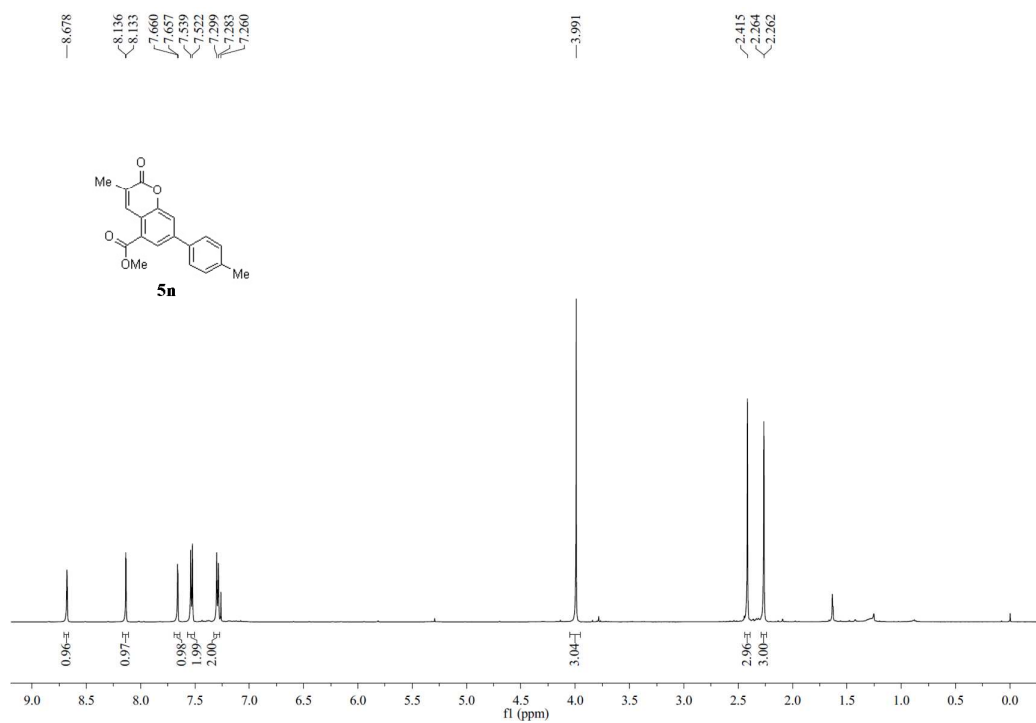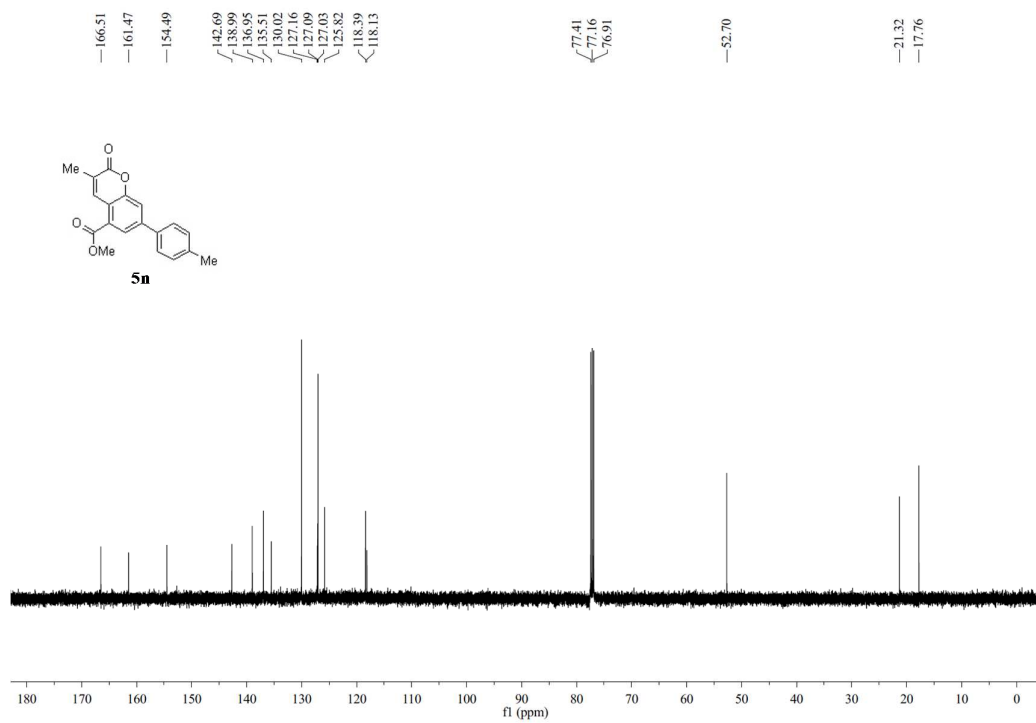

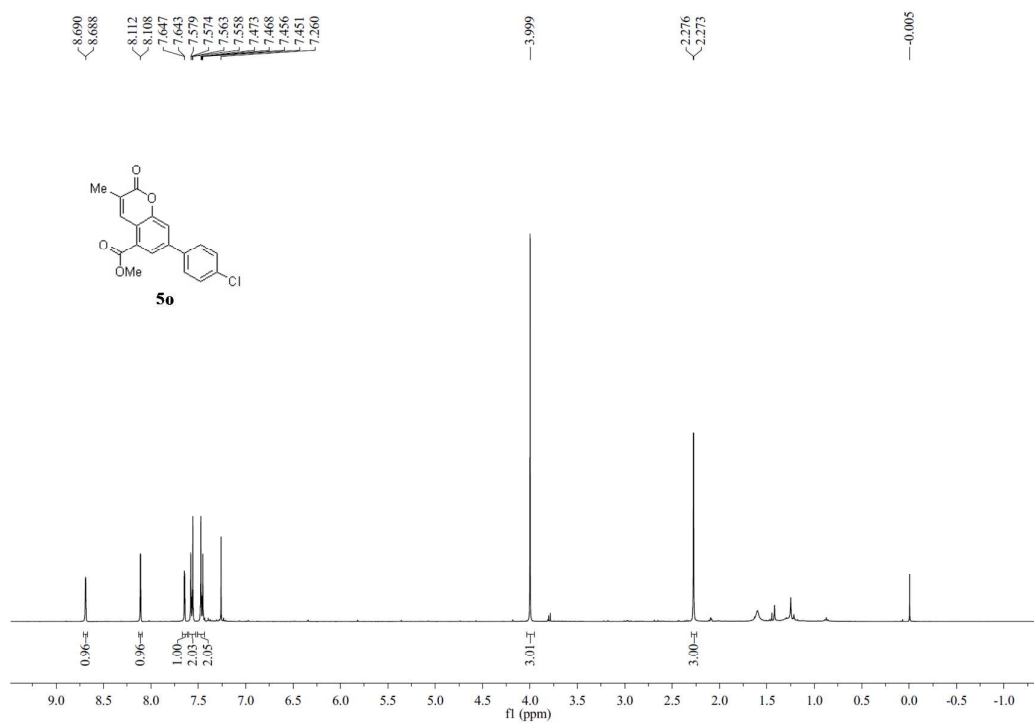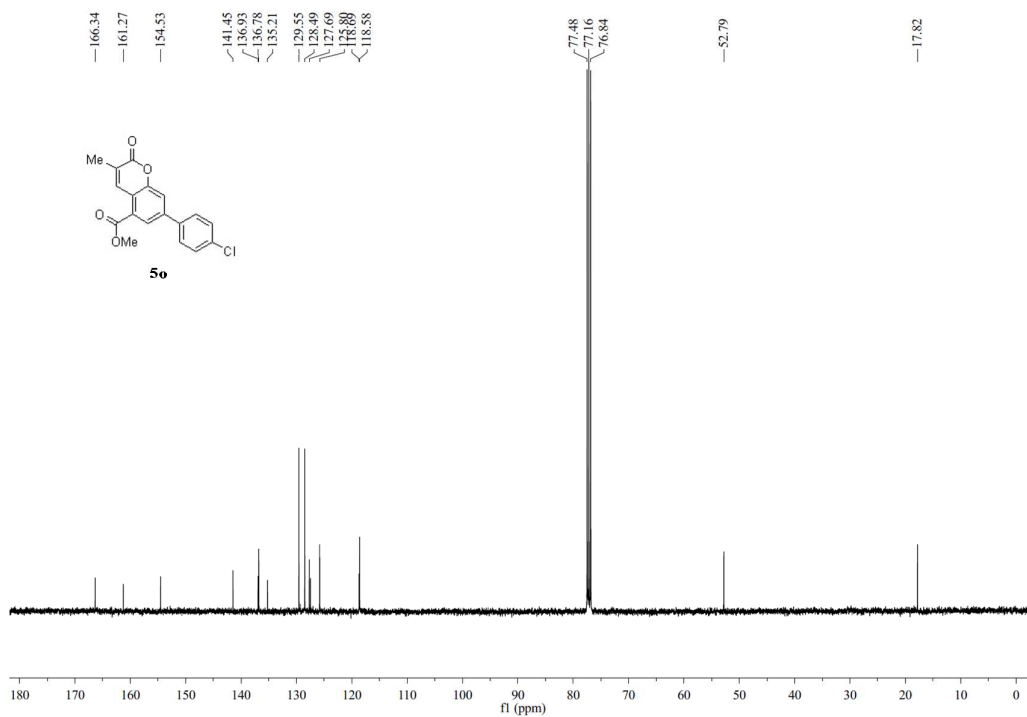

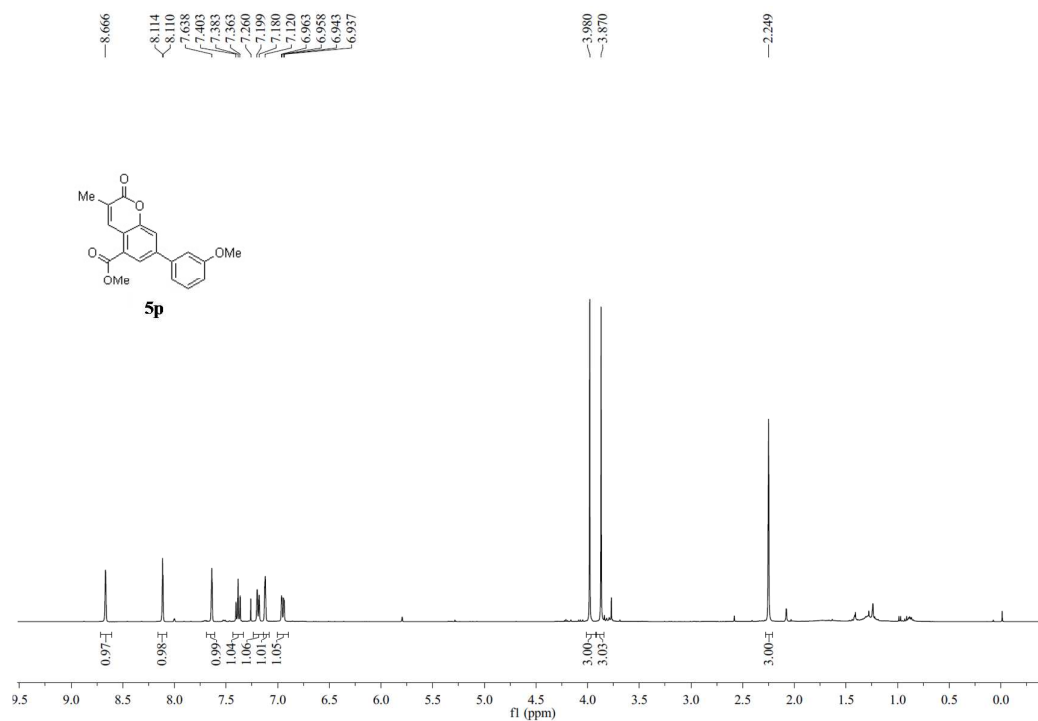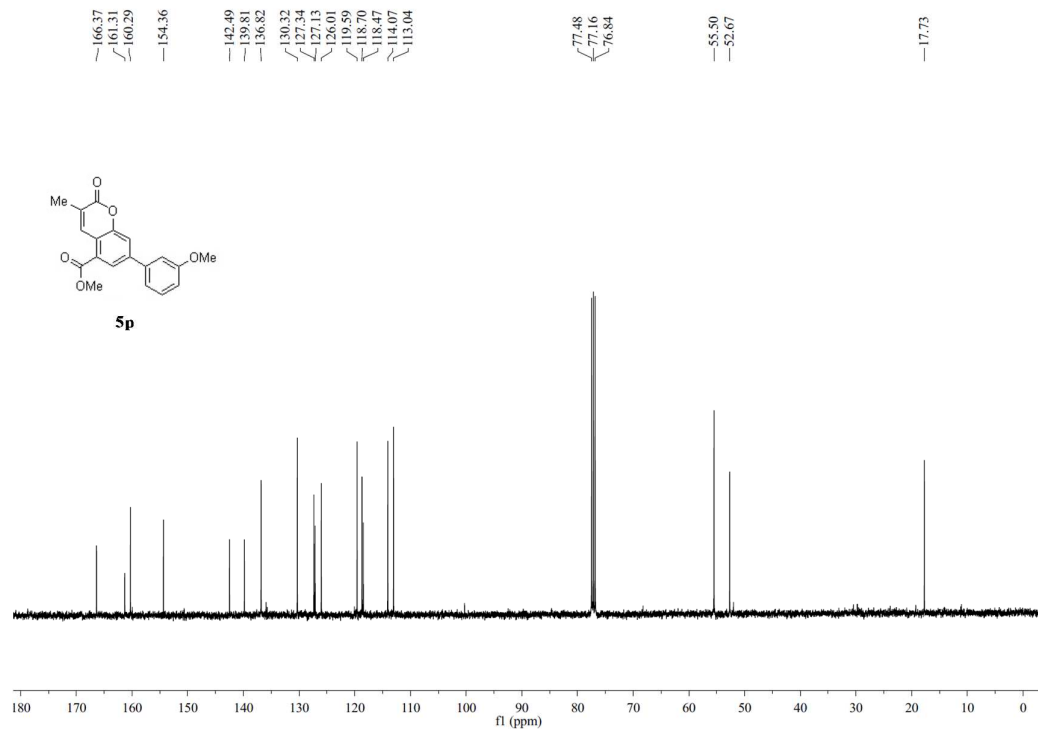

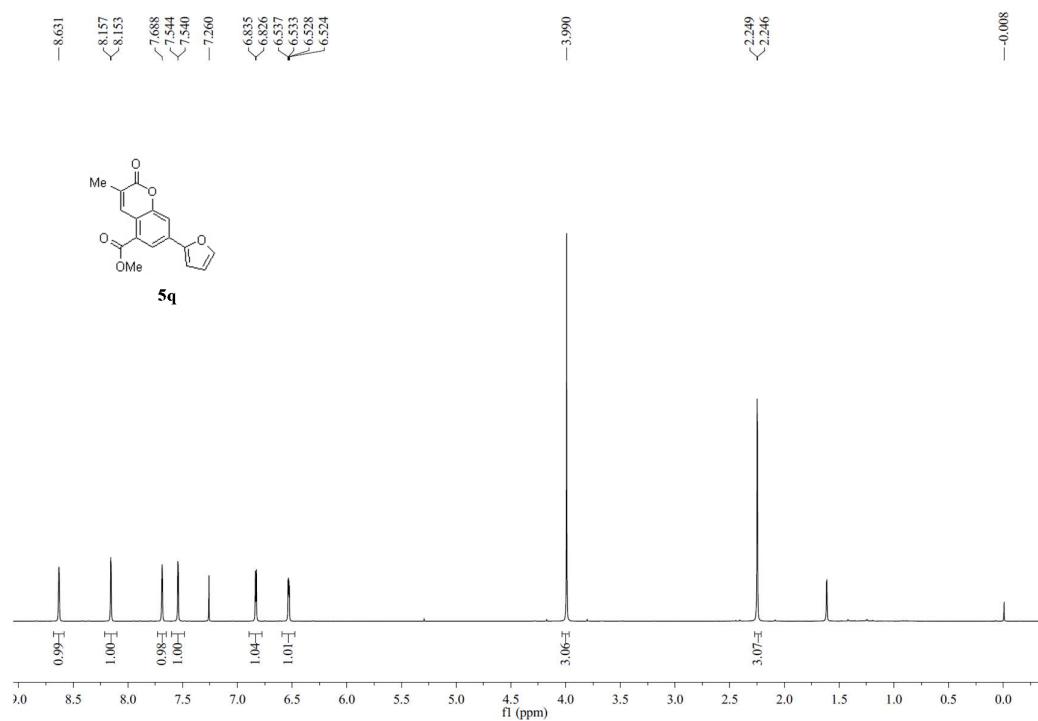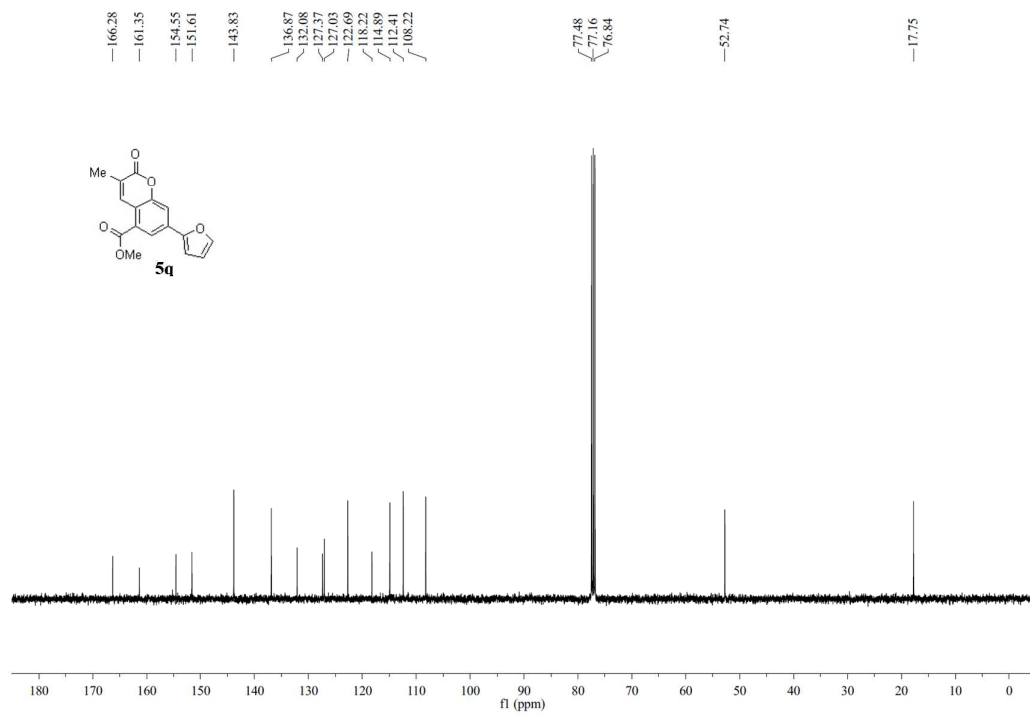

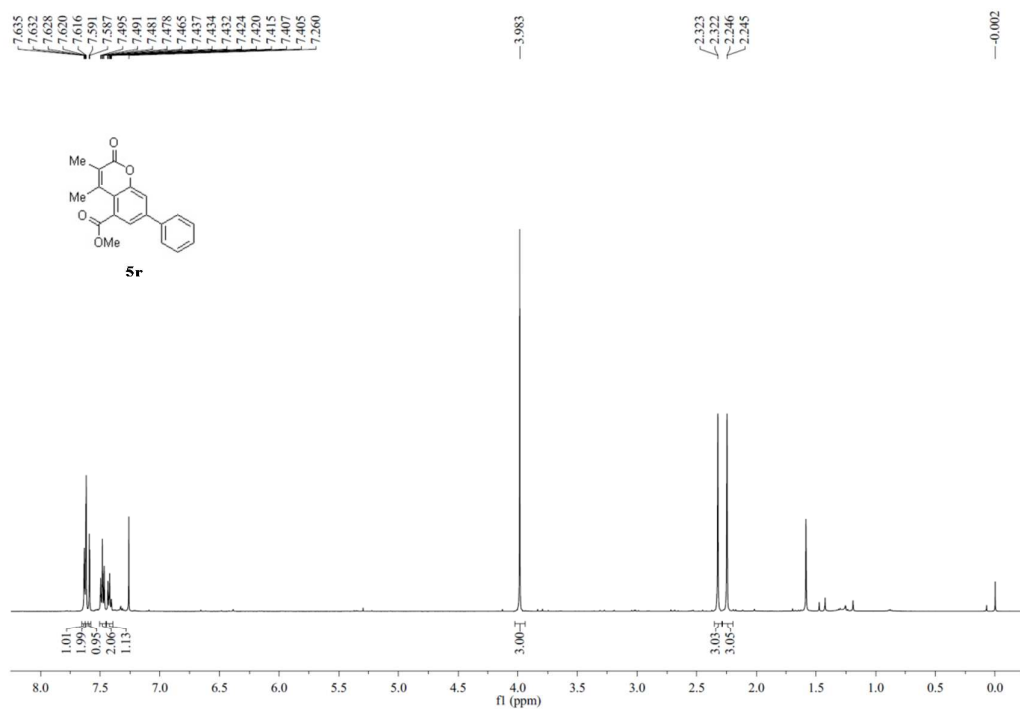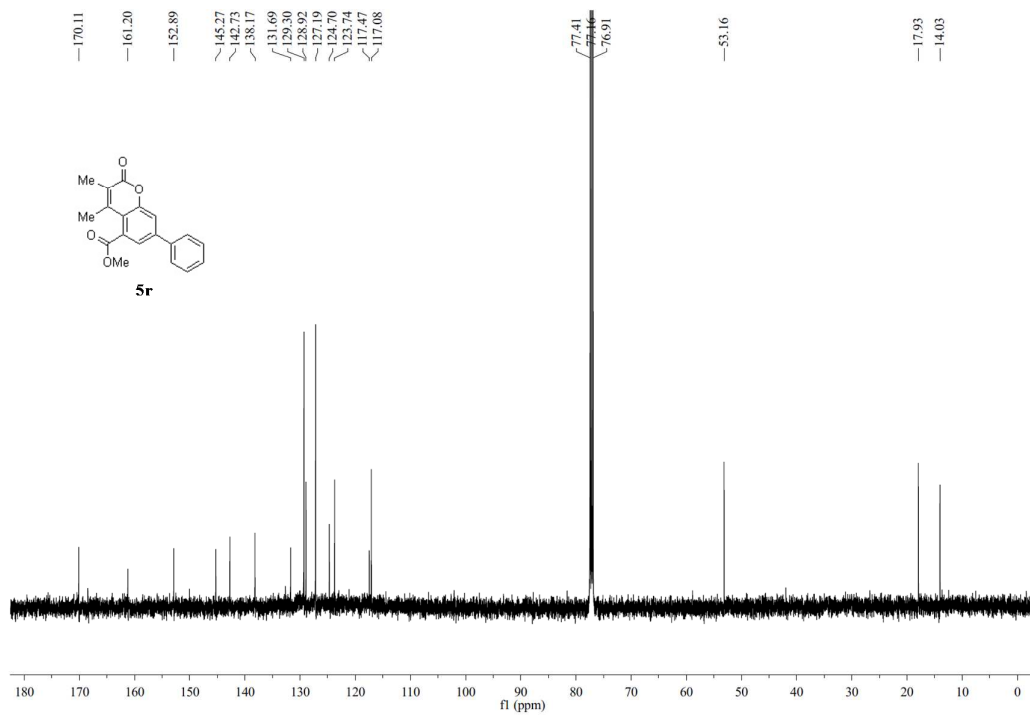

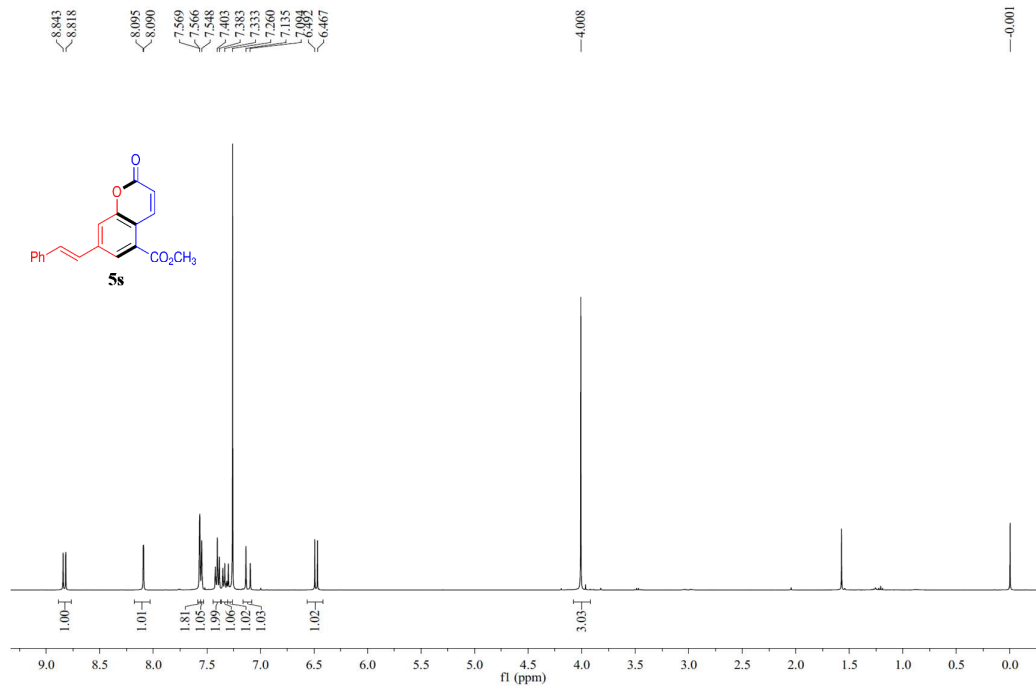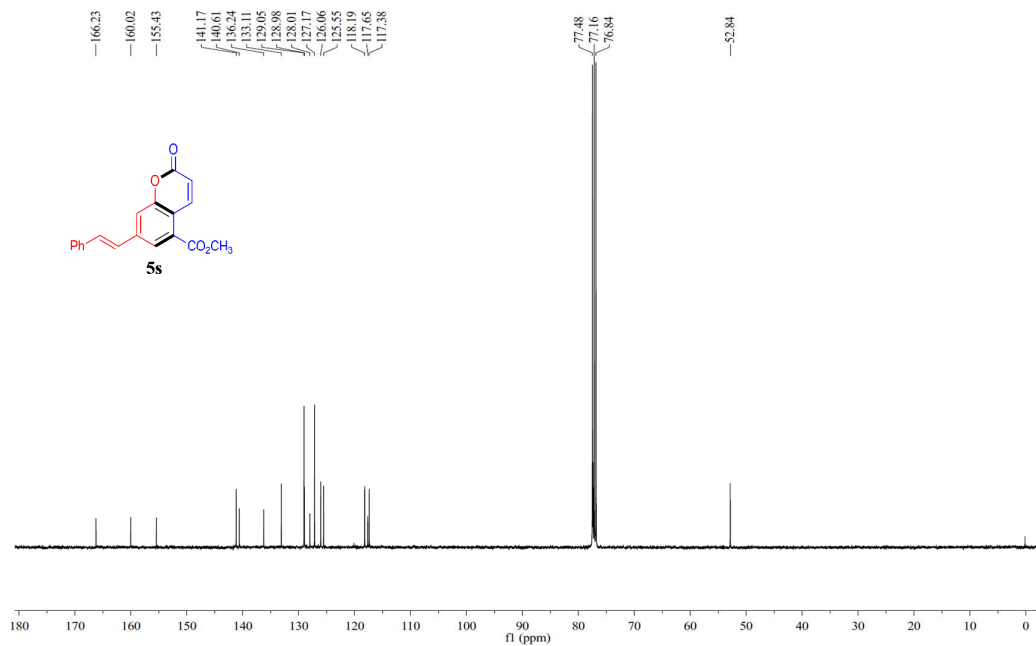

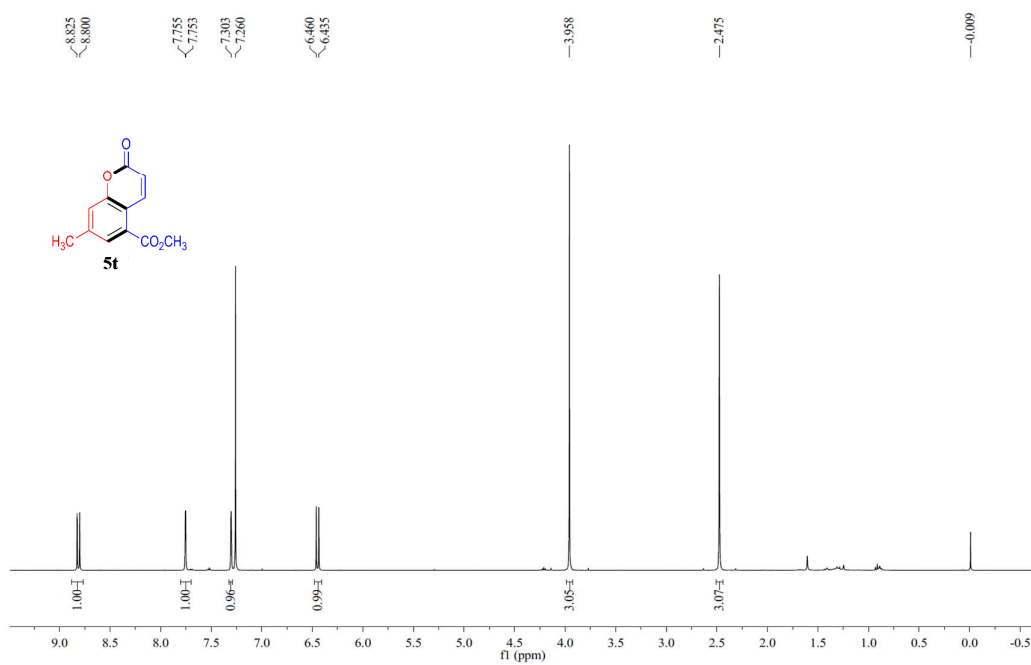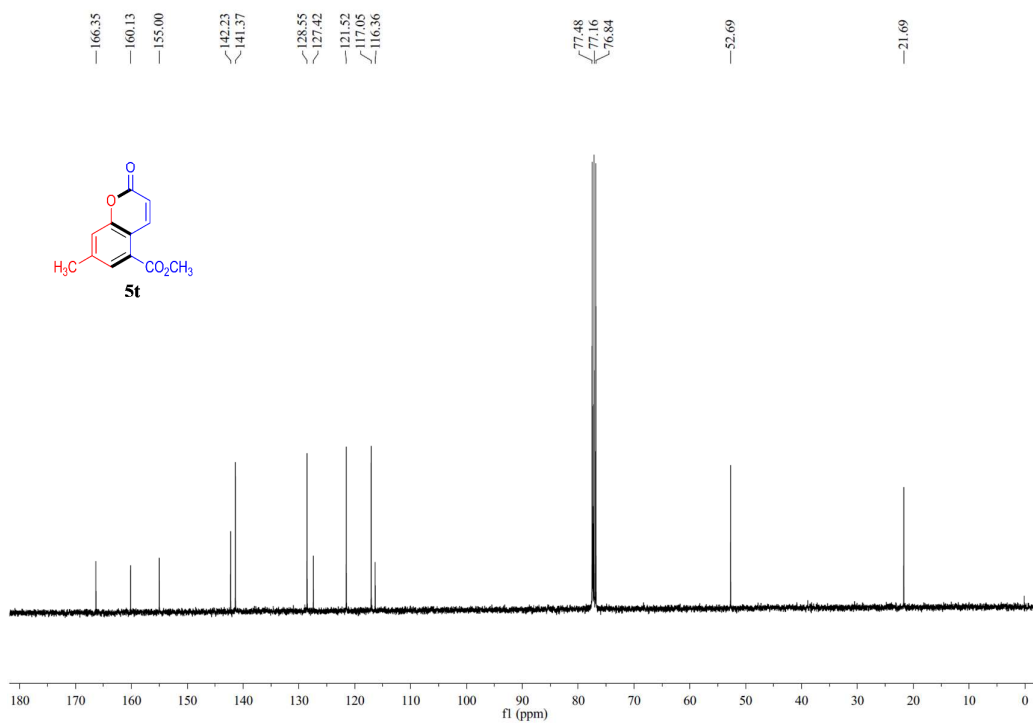

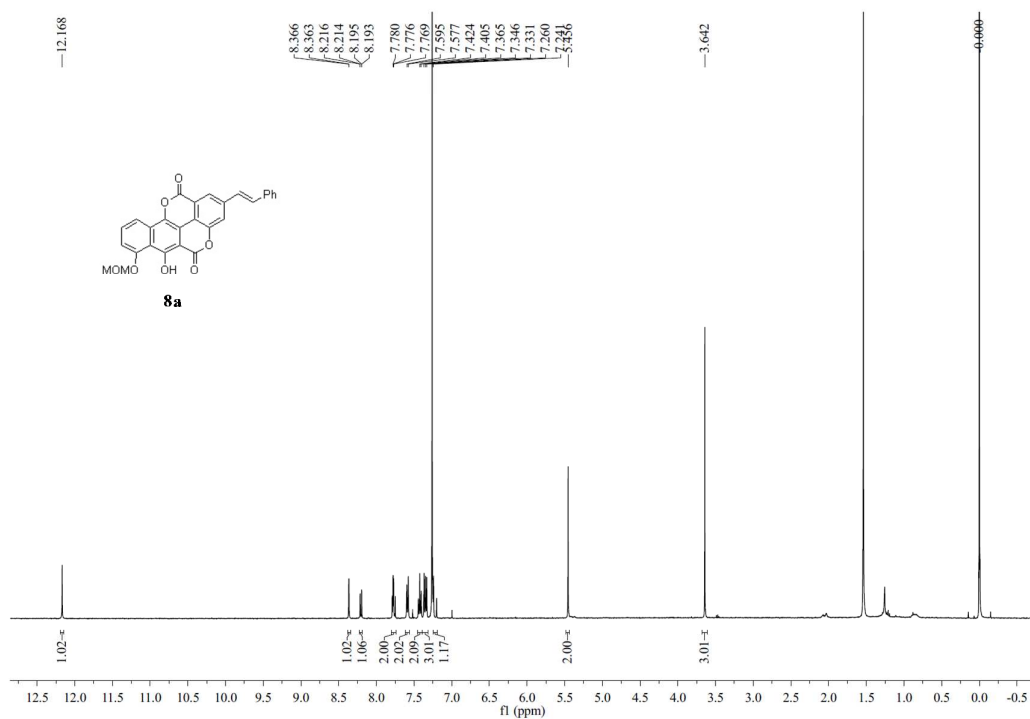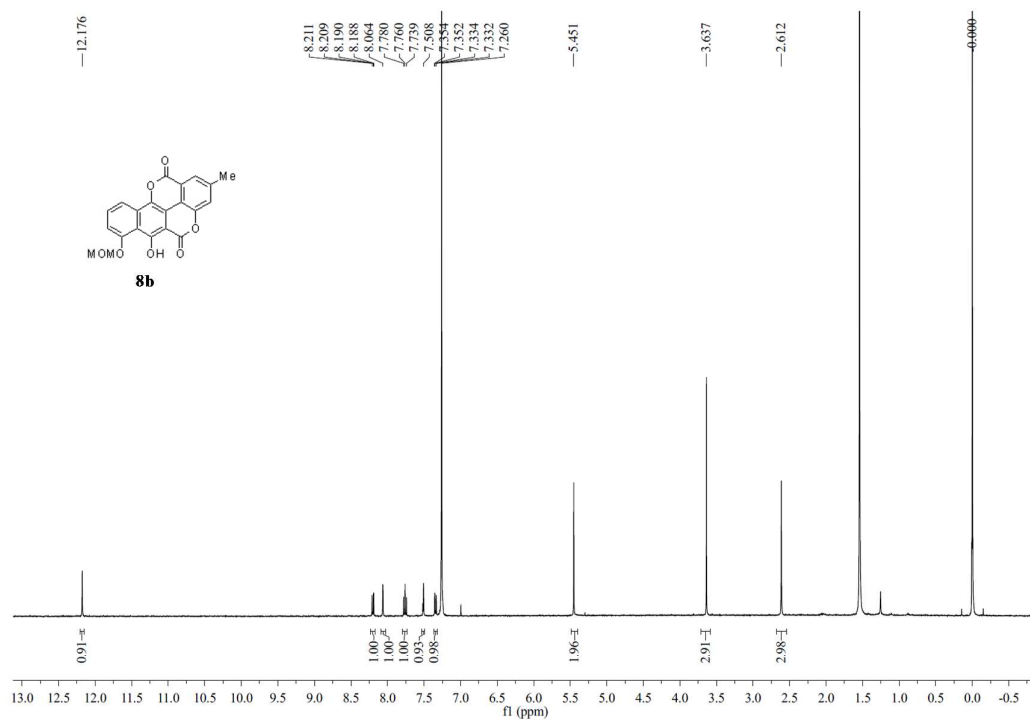



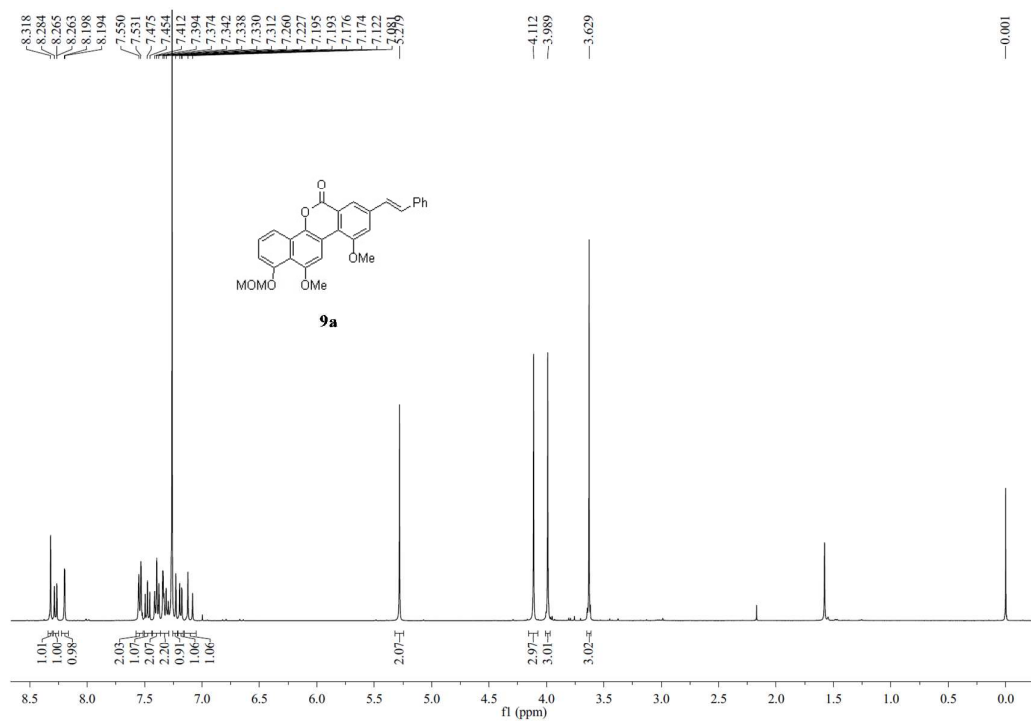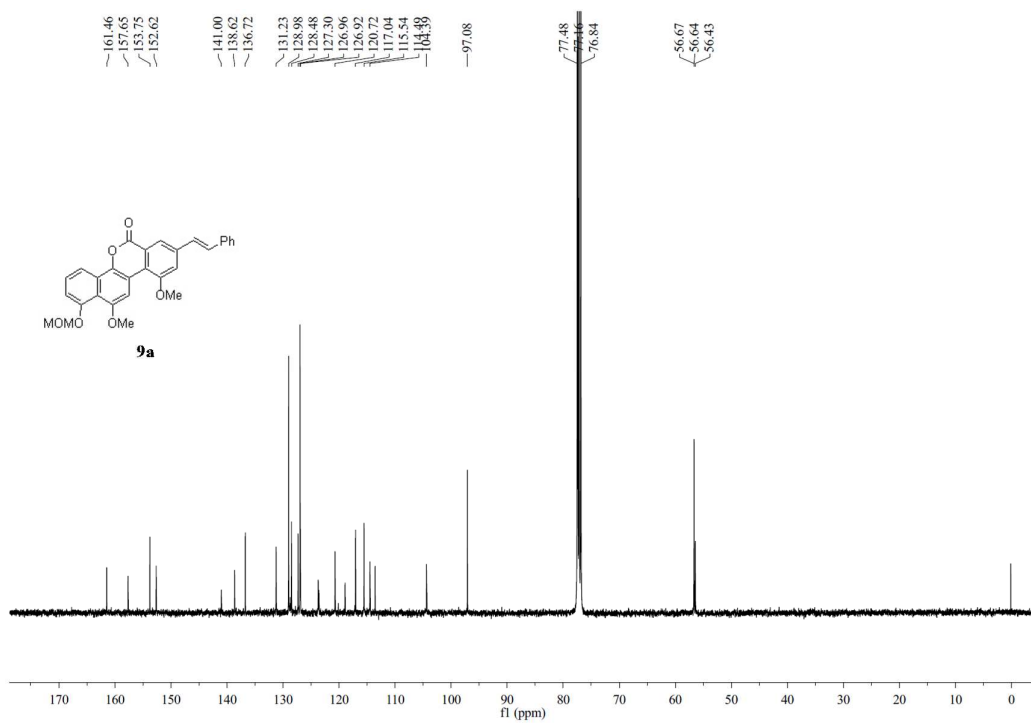

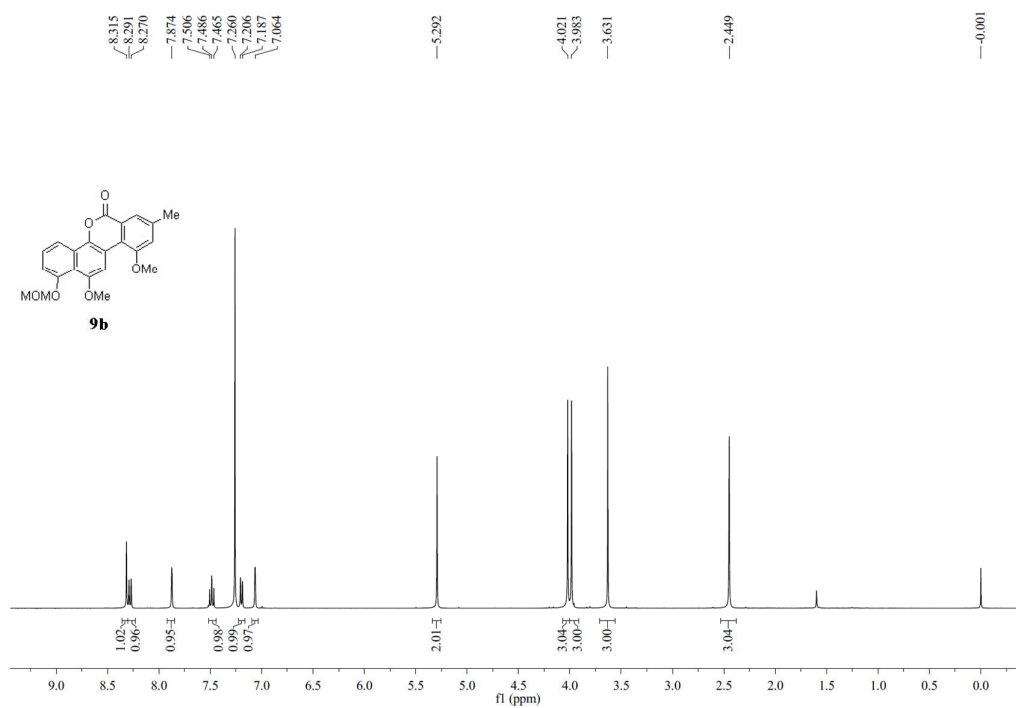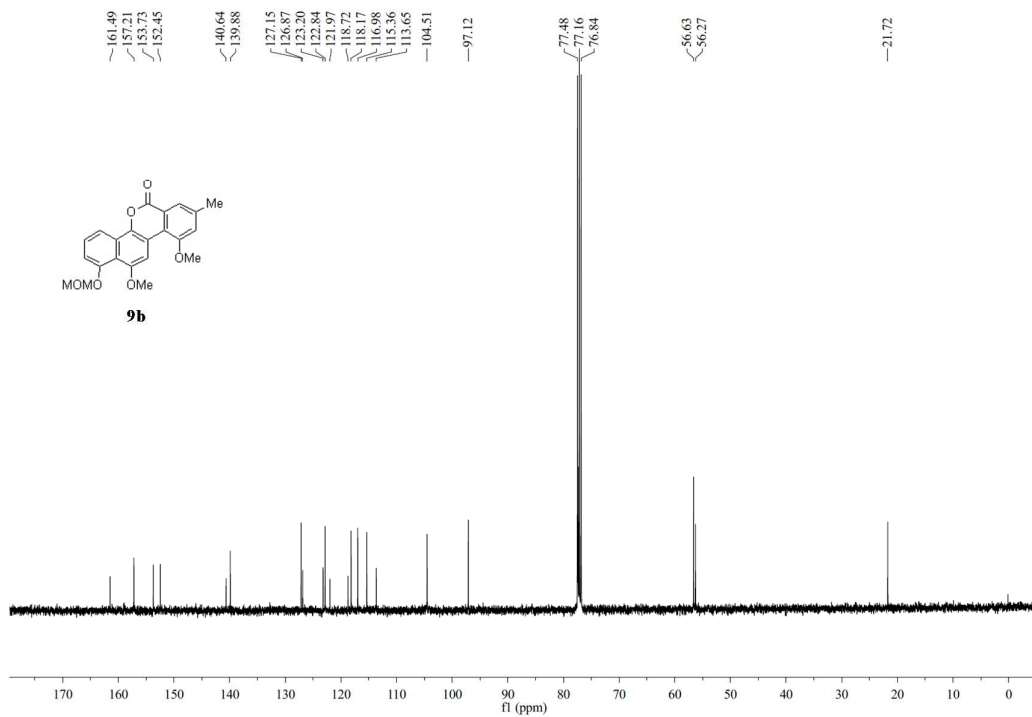

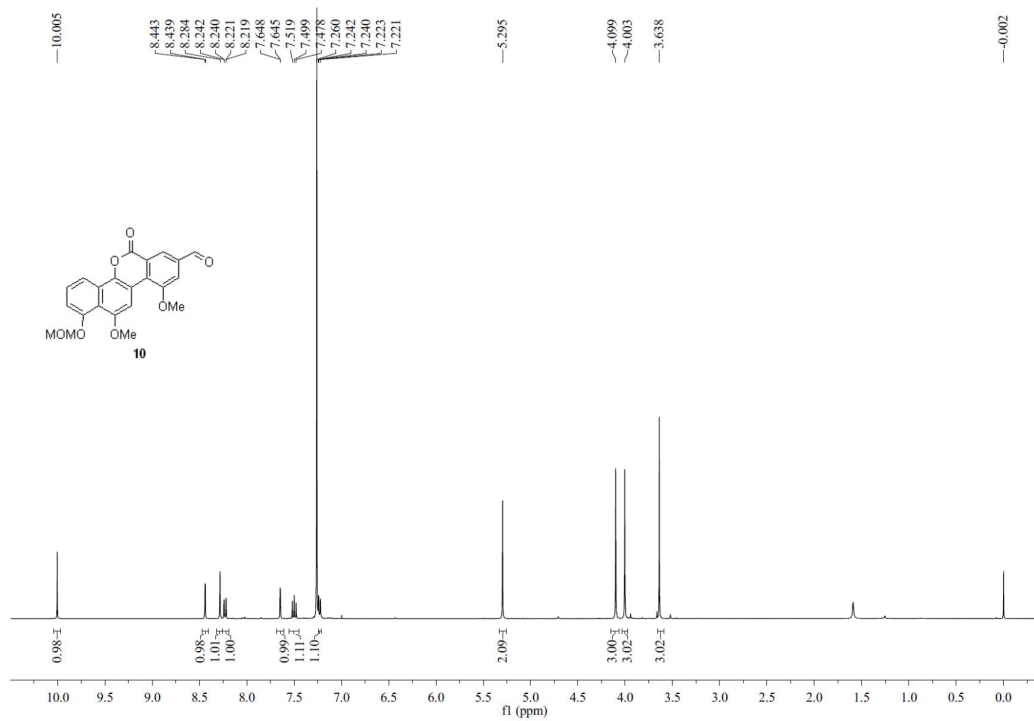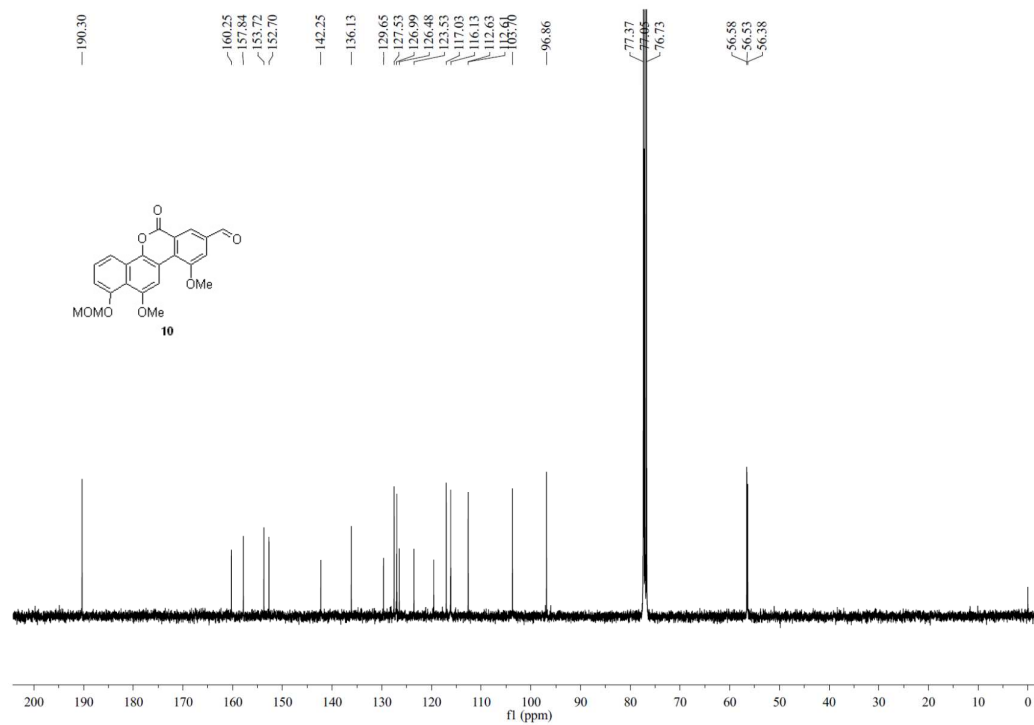

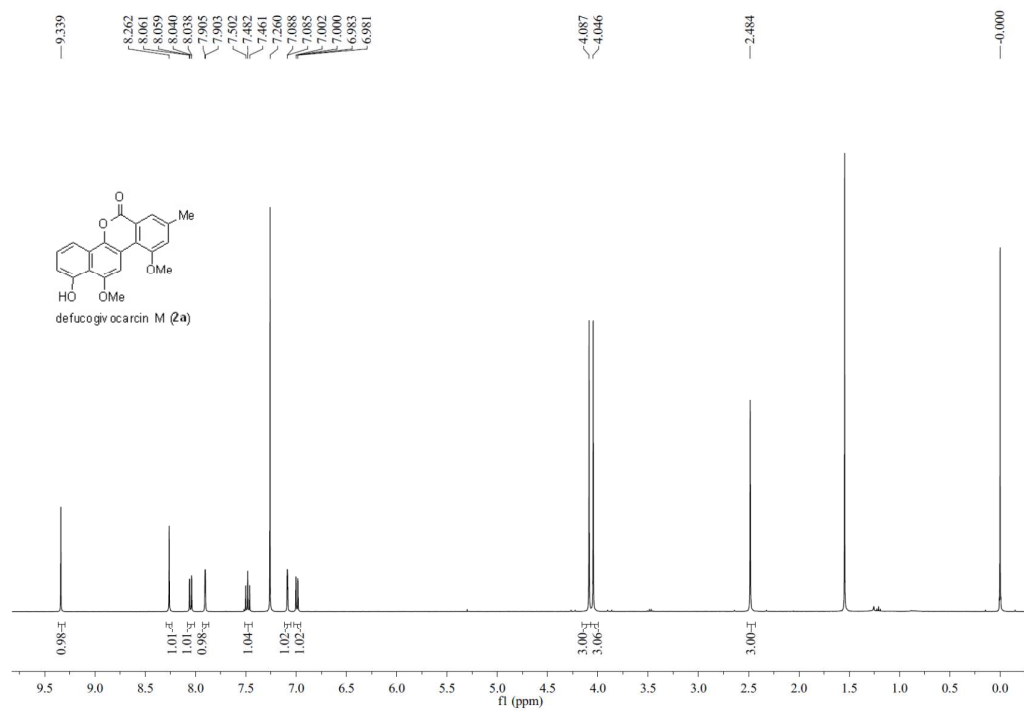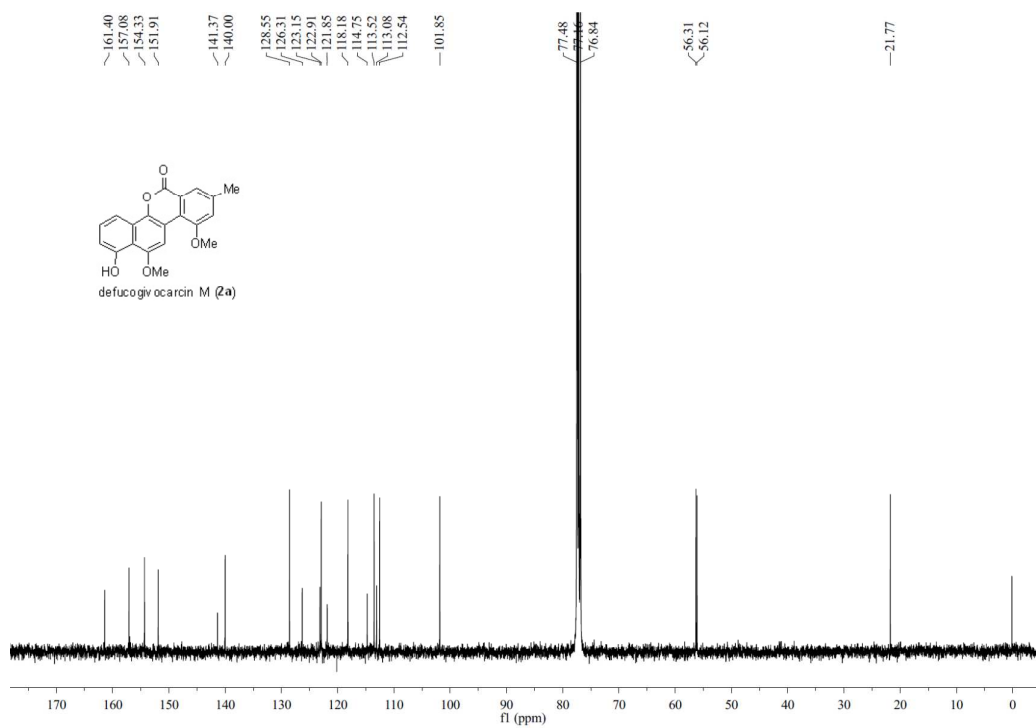

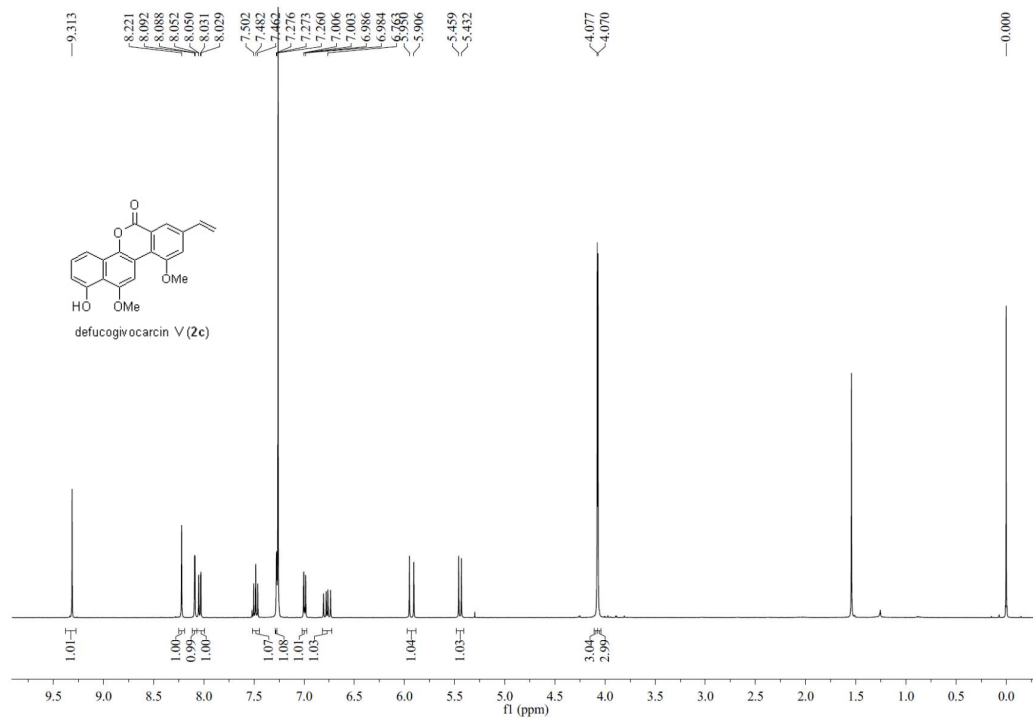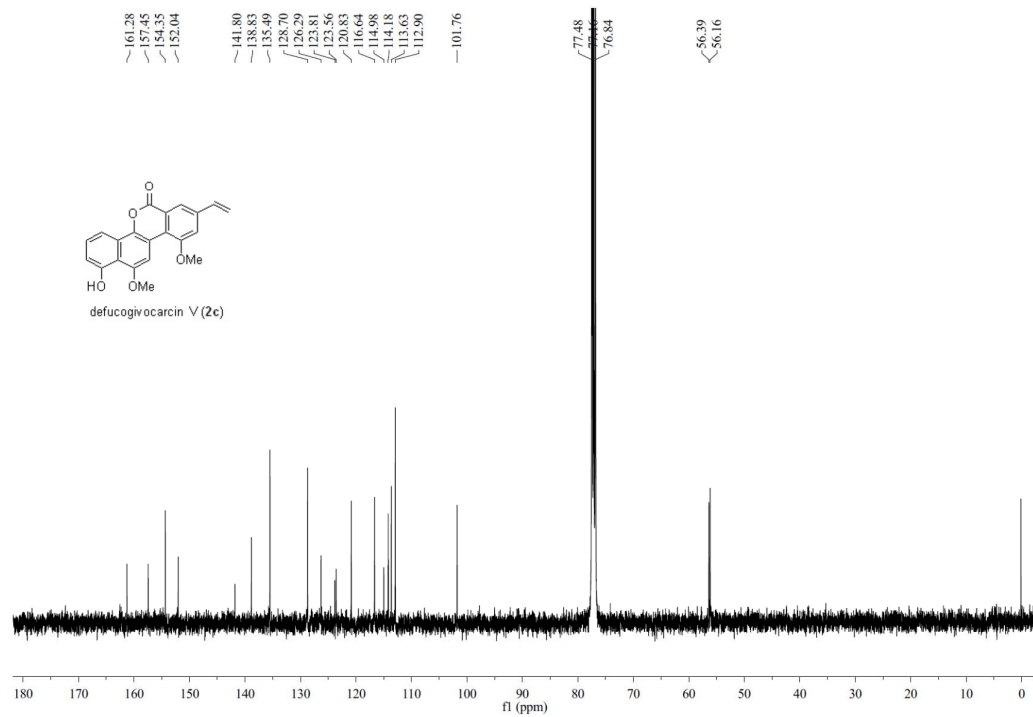

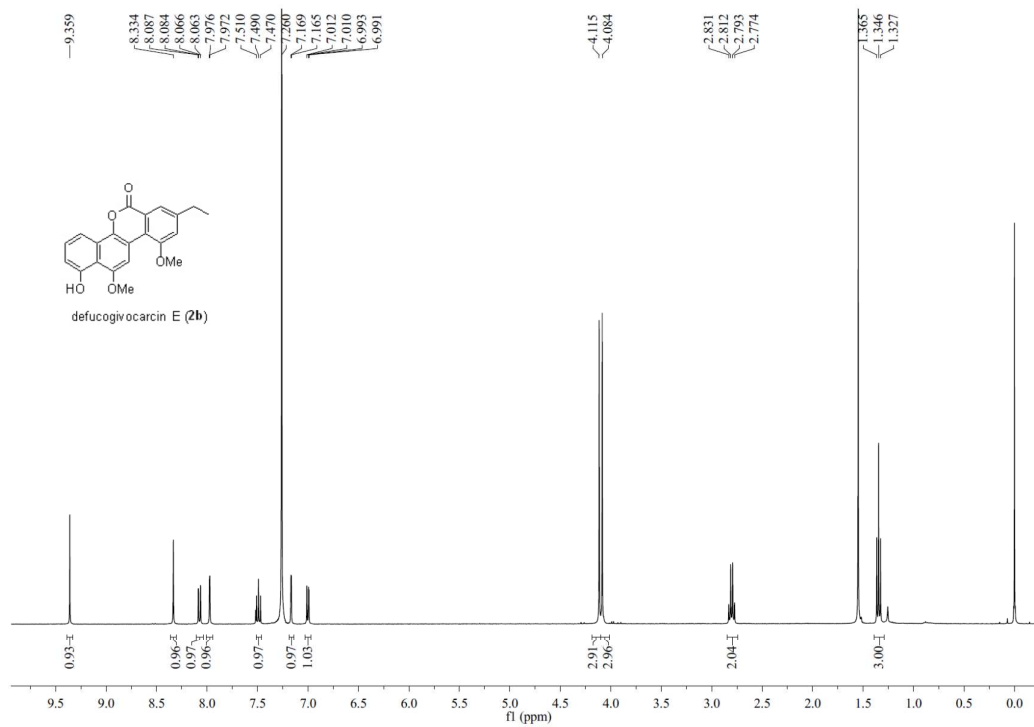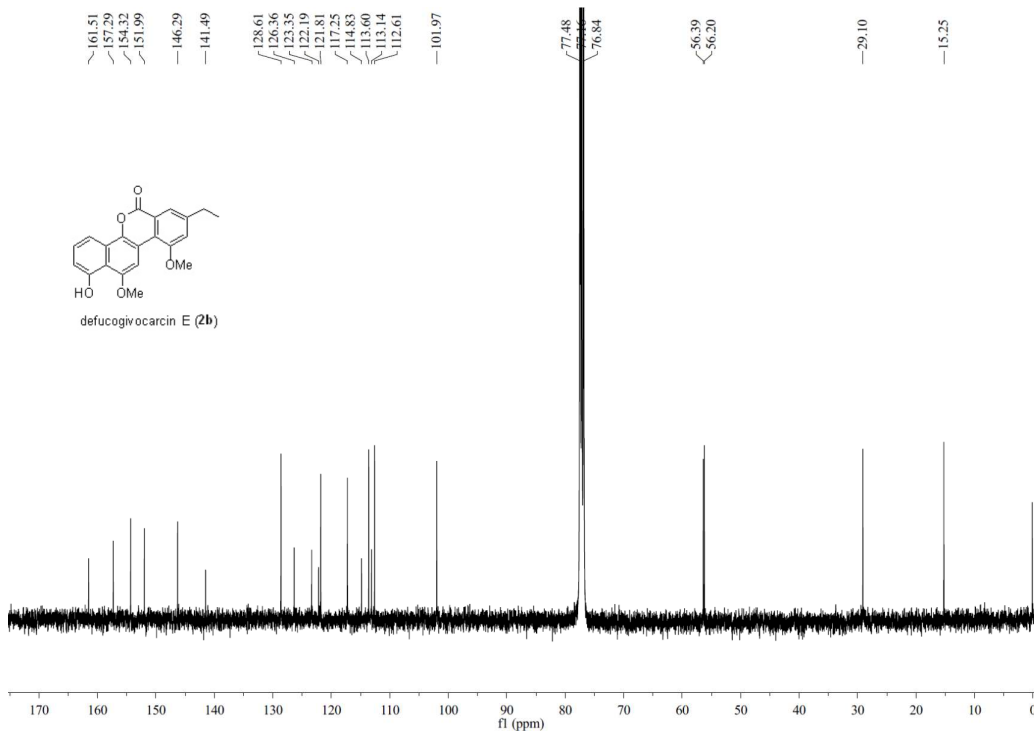

Supplement: Supplementary file 1 [file 9686686]
